# Supplementary material for: Clinical Characterization and Prediction of Clinical Severity of SARS-CoV-2 Infection Among US Adults Using Data From the US National COVID Cohort Collaborative
Source: PubMed Central journal article supplement (PMC8278272; doi:10.1001/jamanetworkopen.2021.16901), 2021-07-13
Supplement: jamanetwopen-e2116901-s001.pdf [file jamanetwopen-e2116901-s001.pdf]

## Supplementary Online Content

Bennett TD, Moffitt RA, Hajagos JG, et al; National COVID Cohort Collaborative (N3C) Consortium. Clinical characterization and prediction of clinical severity of SARS-CoV-2 infection among US adults using data from the US National COVID Cohort Collaborative. *JAMA Netw Open*. 2021;4(7):e2116901. doi:10.1001/jamanetworkopen.2021.16901

**eMethods.** Supplementary Methods

**eTable 1.** N3C Overall Cohort Characteristics

**eTable 2.** Input Variables for Machine Learning

**eTable 3.** N3C Cohort and Variables Supported by Source Data Models

**eTable 4.** Multivariable Logistic Regression Models for Poor Outcome

**eTable 5.** Medications and Organ System Support for Hospitalized Patients, by Severity Group

**eTable 6.** Machine Learning Model Performance Metrics

**eFigure 1.** Cohort Construction

**eFigure 2.** Age, Sex, Race, and Ethnicity Distributions of the Overall N3C Cohort

**eFigure 3.** Trajectories of Additional Laboratory Tests During a Hospital Encounter

**eFigure 4.** Heatmaps Showing Nadir, Average, and Peak Values of Vital Signs, Body Size Metrics, and Laboratory Test Values, by Severity Group

**eFigure 5.** Relatively Few Patients Have Harmonized Blood Type

**eFigure 6.** Antimicrobial Treatments and Immunomodulatory Treatments in Hospitalized Patients

**eFigure 7.** Area Under the Receiver Operator Characteristic (AUROC) Curves for First-Day Machine Learning Models to Predict Subsequent Clinical Severity

**eFigure 8.** Variable Importance in the Machine Learning Models Predicting Clinical Severity

This supplementary material has been provided by the authors to give readers additional information about their work.

---

## eMethods. Supplemental Methods

### *N3C Architecture, Data Integration and Harmonization Pipeline*

The N3C is hosted in a cloud-based, FedRAMP Moderate secure enclave<sup>1</sup> managed by the National Center for Advancing Translational Sciences (NCATS). The N3C Enclave contains 11 Foundry, a data science platform that enables complex and reproducible analysis using a variety of open-source languages (e.g. Python<sup>2</sup>, R<sup>3</sup>, SQL<sup>4</sup>, Java<sup>5</sup>, and also point-and-click and dashboard-style tools. Foundry uses Apache Spark<sup>6</sup> to support distributed operations on very large data sources.

Contributing sites submit a Health Insurance Portability and Accountability Act (HIPAA)-defined limited data set in one of four common data models (CDMs: PCORNet<sup>7</sup>, the Observational Medical Outcomes Partnership [OMOP]<sup>8</sup>, ACT/i2b2<sup>9</sup>, or TriNetX<sup>10</sup>). Sites send updated data payloads approximately weekly. N3C harmonizes site data into OMOP version 5.3.1 in partnership with subject matter experts from each CDM community. In this process, all data (e.g. laboratory measurements, clinical observations such as vital signs, medications, and clinical conditions, are harmonized and mapped to the OMOP vocabulary<sup>8</sup>. Site data that pass a robust data quality assessment pipeline are integrated into the “release” set for use by the community. Details about the data transfer, harmonization, quality, and integration processes have been reported<sup>11</sup>. Decisions about which patients become part of the N3C cohort are made by each data-providing site, following the N3C-provided phenotype definitions. In November 2020, N3C released Phenotype definition 3.0, which specifically defines “controls” as patients who have at least one negative COVID test (PCR, antigen, or antibody), and do not also have a positive test or a diagnosis code of U07.1. Phenotype 1.0 and 2.0, which were used from April 2020 through November 2020, did not define “controls,” but did enable selection of COVID negative patients as part of its criteria. This group of COVID-negative patients was part of the cohort in the N3C enclave during the completion of this analysis. At the time of this manuscript, a mix of phenotype versions 1.0 and 2.0 were being used by data providers.

### *Identifying Hospital Encounters, Comorbidities, Medications, Mechanical Ventilation, Vital Signs, and Laboratory Tests*

We defined a single index encounter for each laboratory-confirmed positive patient by selecting encounters that start up to 30 days before or 7 days after the positive test result, or a positive test result occurs during the visit. When multiple encounters met these criteria, we broke ties by preferentially selecting the encounter in which the most severe outcome was observed, then the longest visit, and finally the most recent visit.

We reconstructed hospital encounters from component “visits” (e.g. a radiology study and a surgical procedure recorded as separate visits) using an algorithm that will be made available to all N3C users. We built hospital encounters from recorded OMOP visits by first filtering to Inpatient (9201), Inpatient Hospital (8717), Intensive Care (32037), Emergency Room (ER) and Inpatient (262), or Inpatient Critical Care Facility (581379) visits of any duration, ER visits (9203) spanning at least 2 calendar days, or Outpatient Visits (9202) spanning exactly two calendar days. These visits were then merged such that any visits with overlapping calendar days would end up in the same hospital stay. Finally, all merged visits that did not contain at least one inpatient or ER visit were unmerged. This process results in combined hospital stays that are separated by a period of at least one calendar day. Finally, visits of any type that occur during a combined hospital stay are added to the hospital stay.

All OMOP concept sets developed for this manuscript are freely available on the platform, versioned, and include attributed input from both informatics and clinical subject matter experts. None of the 4 CDMs support admission, discharge, and transfer (ADT) tables, which complicates analyses of hospital encounters.

We defined comorbidities based on the updated<sup>12</sup> Charlson Comorbidity Index as implemented in the ‘icd’ R package<sup>13</sup>. Unless otherwise noted, we identified medications using the WHO anatomical therapeutic chemical (ATC) definitions.<sup>14</sup> We built an invasive ventilation concept set from standardized terminology codes (International Classification of Diseases [ICD] and Systematized Nomenclature of Medicine [SNOMED]) included in the OMOP CDM. Among hospitalized patients, we assessed serial measurements of heart rate (HR), respiratory rate (RR), temperature, systolic and diastolic blood pressure (SBP and DBP, respectively), pulse oximetry (SpO<sub>2</sub>), and a variety of laboratory tests.

*Software*

We used reproducible pipelines in SQL, R, and Python to conduct all analyses. Our pipelines relied on the *SparkR*<sup>15</sup> and *pyspark*<sup>16</sup> interfaces to Apache Spark<sup>6</sup>. We built machine learning models using Python's 'scikit-learn'<sup>17</sup> and XGBoost packages and visualizations using R's 'ggplot2'<sup>18</sup>, 'ggalluvial'<sup>19</sup>, and 'ggnewscale' packages<sup>20</sup> and Python's Matplotlib package.<sup>21</sup>

*Machine Learning eMethods*

Categorical variables were converted to k-1 dummy variables using Pandas' `get_dummies` (one-hot encoding). For logistic regression and support vector machines, numeric variables were centered to mean zero with unit variance using scikit-learn's `StandardScaler`. Optimal model specific hyperparameters were selected with a grid search performed using scikit-learn's `GridSearchCV` using 5-fold cross validation on the training set with AUROC as the scoring metric. Each grid search included multiple iterations with categorical settings such as solver and with first coarse settings for numeric parameters following a logarithmic scale followed by more specific settings around the values found to perform best. In final training, 5-fold cross validation was performed on the training set to estimate AUROC performance range, see eTable 6 legend and table for more model metrics including mean AUROC and standard deviation of AUROC from the 5-fold cross validation. Scikit-learn provides a common API to extract feature importance for a model. Each ML method has an algorithm for determining feature importance. For XGBoost we used the type "gain", the average gain across all splits the feature is used in; for RandomForest we used Gini; for logistic regression methods (no penalty, L1, L2) we reported ordered absolute value of coefficients (all input data had the mean set to 0 and were scaled to unit variance.) When ranking features from L1-regularized models with a coefficient of 0, we show these in eFigure 8 with an equal lack of importance as having the same ranking in the table.

## Ethics and Regulatory

The N3C Data Enclave is approved under the authority of the NIH Institutional Review Board for Protocol 000082 associated with NIH iRIS reference number: 546652 entitled: “NCATS National COVID-19 Cohort Collaborative (N3C) Data Enclave Repository.” Further information can be found at <https://ncats.nih.gov/n3c/resources>. Each N3C site maintains an IRB-approved data transfer agreement (Johns Hopkins University Reliance Protocol # IRB00249128 or individual site agreements with NIH). The analyses reported in this manuscript were approved separately by the institutional IRB of each investigator with data access (see below). This approval includes a waiver of informed consent.

Use of the N3C data for this study is authorized under the following IRB Protocols:

| Site                               | IRB name                                                                                       | Exempted vs. approved | Protocol number |
|------------------------------------|------------------------------------------------------------------------------------------------|-----------------------|-----------------|
| University of Alabama-Birmingham   | The University of Alabama at Birmingham Office of the Institutional Review Board for Human Use | exempted              | IRB-300006285   |
| University of Colorado             | Colorado Multiple Institutional Review Board                                                   | approved              | 20-2225         |
| Johns Hopkins University           | Johns Hopkins Office of Human Subjects Research - Institutional Review Board                   | approved              | IRB00249128     |
| University of Kentucky             | Medical Institutional Review Board of the University of Kentucky                               | exempted              | 62294           |
| University of Michigan             | University of Michigan Medical School Institutional Review Board                               | approved              | HUM00188854     |
| University of North Carolina       | University of North Carolina Chapel Hill Institutional Review Board                            | exempted              | 20-3106         |
| Oregon State University            | Oregon State University Institutional Review Board                                             | approved              | IRB-2020-0830   |
| University of Rochester            | University of Rochester Research Subjects Review Board                                         | exempted              | STUDY00005366   |
| Stony Brook University             | Office of Research Compliance, Division of Human Subject Protections, Stony Brook University   | exempted              | IRB2020-00604   |
| University of Texas-Medical Branch | Institutional Review Board of the University of Texas Medical Branch                           | exempted              | 20-0245         |

Other referenced resources are available at:

COVID-19 Map - Johns Hopkins Coronavirus Resource Center <https://coronavirus.jhu.edu/map.html>

Institutional Development Award Program Infrastructure for Clinical and Translational Research (IDeA-CTR)

<https://www.nigms.nih.gov/Research/DRCB/IDeA/Pages/IDeA-CTR.aspx>

xgboost <https://github.com/dmlc/xgboost>

## eTables

| Variable, n(%) unless otherwise indicated | All                        | Lab-confirmed Positive   | Lab-confirmed Negative     | Suspected Positive       | No Test for SARS-CoV-2   |
|-------------------------------------------|----------------------------|--------------------------|----------------------------|--------------------------|--------------------------|
| Age, mean (SD)                            | 43.2 (22.9)<br>n=1,925,699 | 41.4 (20.4)<br>n=199,935 | 44.2 (22.6)<br>n=1,339,933 | 39.2 (26.2)<br>n=174,831 | 41.6 (23.1)<br>n=211,000 |
| <b>Sex</b>                                |                            |                          |                            |                          |                          |
| Female                                    | 1,074,141                  | 106,316                  | 750,606                    | 96,073                   | 121,146                  |
| Male                                      | 851,007                    | 93,607                   | 588,750                    | 78,904                   | 89,746                   |
| Other*                                    | 1,378                      | 139                      | 815                        | 205                      | 219                      |
| <b>Race</b>                               |                            |                          |                            |                          |                          |
| White                                     | 1,251,401                  | 104,491                  | 898,340                    | 108,992                  | 139,578                  |
| Black or African-American                 | 301,994                    | 36,243                   | 198,569                    | 35,532                   | 31,650                   |
| Native Hawaiian or Pacific Islander       | 3,034                      | 459                      | 2,000                      | 265                      | 310                      |
| Asian                                     | 48,897                     | 4,690                    | 35,106                     | 4,188                    | 4,913                    |
| Other                                     | 20,626                     | 2,363                    | 1,3813                     | 1,405                    | 3045                     |
| Missing/Unknown                           | 300,574                    | 51,816                   | 192,343                    | 24,800                   | 31,615                   |
| <b>Ethnicity</b>                          |                            |                          |                            |                          |                          |
| Hispanic                                  | 156,401                    | 34,657                   | 93,137                     | 16,668                   | 11,939                   |
| Non-Hispanic                              | 1,498,261                  | 130,297                  | 1,072,760                  | 126,982                  | 168,222                  |
| Missing/Unknown                           | 300,574                    | 51,816                   | 192,343                    | 24,800                   | 31,615                   |
| <b>Insurance Payer</b>                    |                            |                          |                            |                          |                          |
| Medicare                                  | 118,381                    | 7,416                    | 87,102                     | 9,924                    | 13,939                   |
| Commercial                                | 212,527                    | 17,247                   | 137,233                    | 15,437                   | 42,610                   |
| Medicaid                                  | 106,558                    | 9,532                    | 66,677                     | 12,436                   | 17,913                   |
| Other                                     | 1,783,181                  | 186,593                  | 1,252,174                  | 149,335                  | 195,079                  |

### eTable 1: N3C Cohort Characteristics

**eTable 1:** This table shows demographic characteristics and insurance payer for the overall N3C cohort, stratified by the N3C phenotype groups (publicly available on GitHub<sup>22</sup>). SARS-CoV-2 = severe acute respiratory syndrome associated with coronavirus-2. \*Other includes non-binary, no matching concept, and no information. Please note that the lab-confirmed positive and negative counts in this table differ from Table 1 in the main manuscript because Table 1 is restricted to sites with death and ventilation data available.

eTable 2: Input Variables for Machine Learning

|                                                                                                                                                                                                                                                                                                                                                                                                                                                                                                                                                                        | Variable (units)                                       | %present                        | Imputation Strategy                           |
|------------------------------------------------------------------------------------------------------------------------------------------------------------------------------------------------------------------------------------------------------------------------------------------------------------------------------------------------------------------------------------------------------------------------------------------------------------------------------------------------------------------------------------------------------------------------|--------------------------------------------------------|---------------------------------|-----------------------------------------------|
| <p>This table shows the 42 categories of 64 input variables for the machine learning models. The worst value for each variable on the first calendar day of hospital admission was used. We defined the worst value as the lowest value for diastolic blood pressure, hemoglobin, pH, platelet count, SpO<sub>2</sub>, and systolic blood pressure. For the remainder, we used the highest value. NTproBNP = N-Terminal-prohormone B-type Natriuretic Peptide. *(White, Black or African-American, Native Hawaiian or Pacific Islander, Other, or Missing/Unknown)</p> | Age at visit start (years)                             | 100.0%                          | None                                          |
|                                                                                                                                                                                                                                                                                                                                                                                                                                                                                                                                                                        | Sex (Female, Male, or Other)                           | 100.0%                          | Missing values filled with 'Other'            |
|                                                                                                                                                                                                                                                                                                                                                                                                                                                                                                                                                                        | White blood cell count (x10E3/uL)                      | 94.2%                           | Median                                        |
|                                                                                                                                                                                                                                                                                                                                                                                                                                                                                                                                                                        | Platelet count (x10E3/uL)                              | 94.1%                           | Median                                        |
|                                                                                                                                                                                                                                                                                                                                                                                                                                                                                                                                                                        | Hemoglobin (g/dL)                                      | 93.2%                           | Median                                        |
|                                                                                                                                                                                                                                                                                                                                                                                                                                                                                                                                                                        | Creatinine (mg/dL)                                     | 92.9%                           | Median                                        |
|                                                                                                                                                                                                                                                                                                                                                                                                                                                                                                                                                                        | Sodium (mmol/L)                                        | 92.8%                           | Median                                        |
|                                                                                                                                                                                                                                                                                                                                                                                                                                                                                                                                                                        | BUN (mg/dL)                                            | 92.7%                           | Median                                        |
|                                                                                                                                                                                                                                                                                                                                                                                                                                                                                                                                                                        | Chloride (mmol/L)                                      | 92.7%                           | Median                                        |
|                                                                                                                                                                                                                                                                                                                                                                                                                                                                                                                                                                        | Potassium (mmol/L)                                     | 92.5%                           | Median                                        |
|                                                                                                                                                                                                                                                                                                                                                                                                                                                                                                                                                                        | Glucose (mg/dL)                                        | 92.1%                           | Median                                        |
|                                                                                                                                                                                                                                                                                                                                                                                                                                                                                                                                                                        | Ethnicity (Hispanic, Not Hispanic, or Missing/Unknown) | 88.8%                           | Missing values filled with 'Missing/Unknown'  |
|                                                                                                                                                                                                                                                                                                                                                                                                                                                                                                                                                                        | Aspartate Aminotransferase (AST/SGOT, IU/L)            | 83.4%                           | Median                                        |
|                                                                                                                                                                                                                                                                                                                                                                                                                                                                                                                                                                        | Bilirubin (total, mg/dL)                               | 82.9%                           | Median                                        |
|                                                                                                                                                                                                                                                                                                                                                                                                                                                                                                                                                                        | Race*                                                  | 76.7%                           | Missing values filled with 'Missing/Unknown'  |
|                                                                                                                                                                                                                                                                                                                                                                                                                                                                                                                                                                        | Alanine Aminotransferase (ALT/SGPT, IU/L)              | 75.7%                           | Median                                        |
|                                                                                                                                                                                                                                                                                                                                                                                                                                                                                                                                                                        | Absolute Lymphocyte count (x10E3/uL)                   | 74.6%                           | Median                                        |
|                                                                                                                                                                                                                                                                                                                                                                                                                                                                                                                                                                        | Body Weight (kg)                                       | 73.3%                           | Median                                        |
|                                                                                                                                                                                                                                                                                                                                                                                                                                                                                                                                                                        | Absolute Neutrophil count (x10E3/uL)                   | 70.2%                           | Median                                        |
|                                                                                                                                                                                                                                                                                                                                                                                                                                                                                                                                                                        | Diastolic blood pressure (DBP)                         | 65.9%                           | Median                                        |
|                                                                                                                                                                                                                                                                                                                                                                                                                                                                                                                                                                        | Systolic blood pressure (SBP)                          | 65.9%                           | Median                                        |
|                                                                                                                                                                                                                                                                                                                                                                                                                                                                                                                                                                        | Albumin (g/dL)                                         | 57.5%                           | Median                                        |
|                                                                                                                                                                                                                                                                                                                                                                                                                                                                                                                                                                        | Oxygen saturation (SpO <sub>2</sub> )                  | 53.5%                           | Median                                        |
|                                                                                                                                                                                                                                                                                                                                                                                                                                                                                                                                                                        | Ferritin (ng/mL)                                       | 49.3%                           | Male and missing: 150; Female and missing: 75 |
|                                                                                                                                                                                                                                                                                                                                                                                                                                                                                                                                                                        | Respiratory Rate                                       | 49.3%                           | Median                                        |
|                                                                                                                                                                                                                                                                                                                                                                                                                                                                                                                                                                        | C-reactive protein (CRP, mg/L)                         | 49.1%                           | Missing values filled with 10                 |
|                                                                                                                                                                                                                                                                                                                                                                                                                                                                                                                                                                        | Charlson Cancer                                        | 48.6%                           | FALSE                                         |
|                                                                                                                                                                                                                                                                                                                                                                                                                                                                                                                                                                        | Charlson Congestive heart failure (CHF)                | 48.6%                           | FALSE                                         |
|                                                                                                                                                                                                                                                                                                                                                                                                                                                                                                                                                                        | Charlson Dementia                                      | 48.6%                           | FALSE                                         |
|                                                                                                                                                                                                                                                                                                                                                                                                                                                                                                                                                                        | Charlson Diabetes Mellitus                             | 48.6%                           | FALSE                                         |
|                                                                                                                                                                                                                                                                                                                                                                                                                                                                                                                                                                        | Charlson Diabetes Mellitus with complications          | 48.6%                           | FALSE                                         |
|                                                                                                                                                                                                                                                                                                                                                                                                                                                                                                                                                                        | Charlson HIV                                           | 48.6%                           | FALSE                                         |
|                                                                                                                                                                                                                                                                                                                                                                                                                                                                                                                                                                        | Charlson Liver disease (mild)                          | 48.6%                           | FALSE                                         |
|                                                                                                                                                                                                                                                                                                                                                                                                                                                                                                                                                                        | Charlson Liver disease (severe)                        | 48.6%                           | FALSE                                         |
|                                                                                                                                                                                                                                                                                                                                                                                                                                                                                                                                                                        | Charlson Metastases                                    | 48.6%                           | FALSE                                         |
|                                                                                                                                                                                                                                                                                                                                                                                                                                                                                                                                                                        | Charlson Myocardial Infarction                         | 48.6%                           | FALSE                                         |
|                                                                                                                                                                                                                                                                                                                                                                                                                                                                                                                                                                        | Charlson Hemiplegia or paralysis                       | 48.6%                           | FALSE                                         |
|                                                                                                                                                                                                                                                                                                                                                                                                                                                                                                                                                                        | Charlson Peptic ulcer disease                          | 48.6%                           | FALSE                                         |
|                                                                                                                                                                                                                                                                                                                                                                                                                                                                                                                                                                        | Charlson Pulmonary disease                             | 48.6%                           | FALSE                                         |
|                                                                                                                                                                                                                                                                                                                                                                                                                                                                                                                                                                        | Charlson Peripheral vascular disease                   | 48.6%                           | FALSE                                         |
|                                                                                                                                                                                                                                                                                                                                                                                                                                                                                                                                                                        | Charlson Comorbidity Index, Q score                    | 48.6%                           | Missing values filled with 0                  |
|                                                                                                                                                                                                                                                                                                                                                                                                                                                                                                                                                                        | Charlson Renal disease                                 | 48.6%                           | FALSE                                         |
| Charlson Rheumatologic Disease                                                                                                                                                                                                                                                                                                                                                                                                                                                                                                                                         | 48.6%                                                  | FALSE                           |                                               |
| Charlson Stroke                                                                                                                                                                                                                                                                                                                                                                                                                                                                                                                                                        | 48.6%                                                  | FALSE                           |                                               |
| Body mass index (BMI, kg/m <sup>2</sup> )                                                                                                                                                                                                                                                                                                                                                                                                                                                                                                                              | 48.3%                                                  | Median                          |                                               |
| Temperature                                                                                                                                                                                                                                                                                                                                                                                                                                                                                                                                                            | 46.1%                                                  | Median                          |                                               |
| Lactate (mM/L)                                                                                                                                                                                                                                                                                                                                                                                                                                                                                                                                                         | 45.5%                                                  | Missing values filled with 13.5 |                                               |
| D-Dimer (mg/L FEU)                                                                                                                                                                                                                                                                                                                                                                                                                                                                                                                                                     | 43.7%                                                  | Median                          |                                               |
| Troponin all types (ng/mL)                                                                                                                                                                                                                                                                                                                                                                                                                                                                                                                                             | 43.2%                                                  | Median                          |                                               |
| Heart rate                                                                                                                                                                                                                                                                                                                                                                                                                                                                                                                                                             | 34.1%                                                  | Median                          |                                               |
| Bilirubin (conjugated/direct, mg/dL)                                                                                                                                                                                                                                                                                                                                                                                                                                                                                                                                   | 27.0%                                                  | Median                          |                                               |
| pH                                                                                                                                                                                                                                                                                                                                                                                                                                                                                                                                                                     | 26.4%                                                  | Median                          |                                               |
| Procalcitonin (ng/mL)                                                                                                                                                                                                                                                                                                                                                                                                                                                                                                                                                  | 24.9%                                                  | Missing values filled with 0.02 |                                               |
| Hemoglobin-glycosylated (A1C, %)                                                                                                                                                                                                                                                                                                                                                                                                                                                                                                                                       | 20.2%                                                  | Median                          |                                               |
| Erythrocyte Sedimentation Rate (mm/hr)                                                                                                                                                                                                                                                                                                                                                                                                                                                                                                                                 | 19.6%                                                  | Missing values filled with 19   |                                               |

|  |                  |       |                                |
|--|------------------|-------|--------------------------------|
|  | NTproBNP (pg/mL) | 18.3% | Missing values filled with 125 |
|  | BNP (pg/mL)      | 16.3% | Missing values filled with 100 |

**eTable 3.** N3C Cohort and Variables Supported by Source Data Models

a: N3C Cohort by Source Data Model

This table shows the representation among N3C sites of each common data model (CDM). CDMs include the National Patient-Centered Clinical Research Network (PCORnet),<sup>7</sup> the Observational Health Data Sciences and Informatics (OHDSI) network,<sup>23</sup> the Accrual to Clinical Trials (ACT) network,<sup>9</sup> and TriNetX<sup>10</sup>. This table includes a total of 36 sites. Two sites are dropped prior to analysis due to missing date data (see eFigure 1).

| Data model | # N3C Sites | # Patients represented |
|------------|-------------|------------------------|
| OMOP       | 6           | 305,376                |
| PCORnet    | 12          | 1,036,073              |
| i2b2/ACT   | 6           | 359,920                |
| TriNetX    | 10          | 444,690                |

b: Variables Supported by Source Data Models[1]

S = supported, NS = not supported. [1] Variables *supported* by a data model may not be *required* by that model to conform to the model's specification. Thus, some systematic missingness may be at the site level rather than the model level. [2] Many of the items marked "not supported" for ACT can technically be stored in the i2b2 data model, which underlies ACT; however, they are not supported by the ACT ontology at this time, and are not harmonized by N3C. [3] All models support both quantitative and qualitative lab results; however, many sites only map a subset of their qualitative lab results to the model's vocabulary. \*A small set of vitals are defined by the model; additional vital data can optionally be modelled as "observations"

|                                                | <u>OMOP</u>      | <u>PCORnet</u>       | <u>ACT 2 </u>        | <u>TriNetX</u>   |
|------------------------------------------------|------------------|----------------------|----------------------|------------------|
| Patient Demographics                           | S                | S                    | S                    | S                |
| Visit (encounter) details                      | S                | S                    | S                    | S                |
| Discharge disposition                          | S                | S                    | NS                   | NS               |
| Diagnoses                                      | S                | S                    | S                    | S                |
| Medications                                    | S                | S                    | S                    | S                |
| Laboratory results[3]                          | S                | S                    | S                    | S                |
| Procedures                                     | S                | S                    | S                    | S                |
| Vital signs                                    | S                | S*                   | NS                   | S                |
| Location of patient residence (ZIP code-level) | S                | S                    | NS                   | S                |
| Death                                          | S, date required | S, date not required | S, date not required | S, date required |
| Admission - Discharge - Transfer transactions  | NS               | NS                   | NS                   | NS               |
| Insurance                                      | S                | S                    | NS                   | NS               |



eTable 4: Multivariable Logistic Regression Models for Poor Outcome

This table shows odds ratios (ORs) and 95% confidence intervals (CIs) for 2 multivariable logistic regression models, one with missing/unknown as a category when relevant and one with complete cases only. LCL = lower confidence limit, lower bound of 95% CI. UCL = upper confidence limit, upper bound of 95% CI. See Results for details. These models were built after the prediction models and are for inference only.

|                      |                           | <u>Missing encoded</u>       |                | <u>Missing cases dropped</u> |                |
|----------------------|---------------------------|------------------------------|----------------|------------------------------|----------------|
|                      |                           | <b>OR<br/>(LCL,UC<br/>L)</b> | <b>p-value</b> | <b>OR<br/>(LCL,UC<br/>L)</b> | <b>p-value</b> |
| <b>Age</b>           | per year                  | 1.034<br>(1.032,1.036)       | p < 0.0001     | 1.032<br>(1.025,1.038)       | p < 0.0001     |
| <b>Comorbidities</b> | Diabetes mellitus         | 1.05<br>(0.98,0.12)          | p = 0.2106     | 0.85<br>(0.68,1.06)          | p = 0.1557     |
|                      | Liver disease             | 1.20<br>(1.08,1.34)          | p = 0.0010     | 1.07<br>(0.78,1.45)          | p = 0.6915     |
|                      | Cancer                    | 0.96<br>(0.87,1.05)          | p = 0.3922     | 0.85<br>(0.64,1.12)          | p = 0.2403     |
|                      | Pulmonary                 | 0.93<br>(0.86,1.01)          | p = 0.0886     | 0.91<br>(0.71,1.15)          | p = 0.4259     |
|                      | Renal                     | 1.06<br>(0.97,1.15)          | p = 0.2053     | 0.91<br>(0.71,1.18)          | p = 0.4938     |
|                      | Congestive Heart Failure  | 1.07<br>(0.98,1.17)          | p = 0.1226     | 0.88<br>(0.66,1.15)          | p = 0.3431     |
|                      | Rheumatic Disease         | 0.83<br>(0.72,0.96)          | p = 0.0151     | 0.93<br>(0.62,1.38)          | p = 0.7210     |
|                      | Dementia                  | 1.26<br>(1.13,1.41)          | p < 0.0001     | 0.80<br>(0.54,1.19)          | p = 0.2761     |
|                      | none of the above         | 1.00                         | ref.           | 1.00                         | ref.           |
| <b>Gender</b>        | Male                      | 1.60<br>(1.507,1.69)         | p < 0.0001     | 1.70<br>(1.40,2.01)          | p < 0.0001     |
|                      | Female                    | 1.00                         | ref.           | 1.00                         | ref.           |
| <b>Ethnicity</b>     | Hispanic or Latino        | 1.04<br>(0.94,1.15)          | p = 0.4663     | 1.04<br>(0.72,1.49)          | p = 0.8381     |
|                      | Not Hispanic or Latino    | 1.00                         | ref.           | 1.00                         | ref.           |
|                      | <i>unknown</i>            | 1.14<br>(1.04,1.25)          | p = 0.0057     |                              |                |
| <b>Race</b>          | Black or African-American | 1.12<br>(1.05,1.20)          | p = 0.0011     | 1.21<br>(0.97,1.51)          | p = 0.0930     |
|                      | Asian                     | 1.33<br>(1.12,1.57)          | p = 0.0011     | 2.36<br>(1.38,4.04)          | p = 0.0017     |
|                      | Other                     | 1.25<br>(0.999,1.56)         | p = 0.0477     | 1.22<br>(0.74,1.97)          | p = 0.4255     |
|                      | White                     | 1.00                         | ref.           | 1.00                         | ref.           |
|                      | <i>unknown</i>            | 1.19<br>(1.08,1.31)          | p = 0.0005     |                              |                |
| <b>BMI</b>           | over 30                   | 1.36<br>(1.27,1.46)          | p < 0.0001     | 1.41<br>(1.16,1.73)          | p = 0.0008     |
|                      | 30 or under               | 1.00                         | ref.           | 1.00                         | ref.           |
|                      | <i>unknown</i>            | 1.23<br>(1.14,1.32)          | p < 0.0001     |                              |                |
| <b>Blood type</b>    | A                         | 0.90<br>(0.76,1.08)          | p = 0.2660     | 0.93<br>(0.75,1.15)          | p = 0.4910     |
|                      | B                         | 0.97<br>(0.76,1.23)          | p = 0.7884     | 1.12<br>(0.84,1.49)          | p = 0.4405     |
|                      | AB                        | 0.55<br>(0.32,0.92)          | p = 0.0256     | 0.53<br>(0.29,0.94)          | p = 0.0353     |
|                      | O                         | 1.00                         | ref.           | 1.00                         | ref.           |

|                  |                |                     |            |  |                     |            |
|------------------|----------------|---------------------|------------|--|---------------------|------------|
|                  | <i>unknown</i> | 0.37<br>(0.32,0.41) | p < 0.0001 |  |                     |            |
| <b>Rh factor</b> | negative       | 0.94<br>(0.70,1.25) | p = 0.6621 |  | 1.11<br>(0.78,0.94) | p = 0.5477 |
|                  | positive       | 1.00                | ref.       |  | 1.00                | ref.       |

eTable 5: Antimicrobials and Immunomodulation, Respiratory, Cardiovascular, and Renal Organ System Support for Hospitalized Patients, by Severity Group

eTable 5a: Antimicrobials and Immunomodulation

This table shows the percent of patients in each category who received each medication type. ED = Emergency Department. WHO = World Health Organization. ECMO = extracorporeal membrane oxygenation. LOS = length of stay. We stratified patients using the Clinical Progression Scale (CPS) established by the World Health Organization (WHO) for COVID-19 clinical research.<sup>24</sup> Severity assigned by patient-specific encounter maximum severity.

eTable 5b: Respiratory, Cardiovascular, and Renal Organ System Support for Hospitalized Patients, by Severity Group

This table shows the percent of patients in each category who received each treatment type. ED = Emergency Department. WHO = World Health Organization. ECMO = extracorporeal membrane oxygenation. LOS = length of stay. We stratified patients using the Clinical Progression Scale (CPS) established by the World Health Organization (WHO) for COVID-19

clinical research.<sup>24</sup> Severity assigned by patient-specific encounter maximum severity. CRRT = Continuous Renal Replacement Therapy. HD = hemodialysis.

| <b>A</b>                       | <b>Moderate Hospitalized without invasive ventilation WHO Severity 4-6</b> | <b>Severe Hospitalized with invasive ventilation or ECMO WHO Severity 7-9</b> | <b>Hospital Mortality or Discharge to Hospice WHO Severity 10</b> | <b>B</b>                             | <b>Moderate Hospitalized without invasive ventilation WHO Severity 4-6</b> | <b>Severe Hospitalized with invasive ventilation or ECMO WHO Severity 7-9</b> | <b>Hospital Mortality or Discharge to Hospice WHO Severity 10</b> |
|--------------------------------|----------------------------------------------------------------------------|-------------------------------------------------------------------------------|-------------------------------------------------------------------|--------------------------------------|----------------------------------------------------------------------------|-------------------------------------------------------------------------------|-------------------------------------------------------------------|
| <b><u>Antimicrobials</u></b>   |                                                                            |                                                                               |                                                                   | <b><u>Respiratory Support</u></b>    |                                                                            |                                                                               |                                                                   |
| Remdesivir                     | 15.31%                                                                     | 25.13%                                                                        | 20.08%                                                            | Inhaled Nitric Oxide                 | 0.00%                                                                      | 0.04%                                                                         | 0.08%                                                             |
| Lopinavir/Ritonavir            | 0.36%                                                                      | 1.94%                                                                         | 1.09%                                                             | Epoprostenol                         | 0.11%                                                                      | 7.06%                                                                         | 6.52%                                                             |
| Hydroxychloroquine             | 6.85%                                                                      | 21.76%                                                                        | 14.65%                                                            |                                      |                                                                            |                                                                               |                                                                   |
| Chloroquine                    | 0.04%                                                                      | 0.61%                                                                         | 0.19%                                                             | <b><u>Cardiovascular Support</u></b> |                                                                            |                                                                               |                                                                   |
| Any Antibacterial              |                                                                            |                                                                               |                                                                   | Amiodarone                           | 0.63%                                                                      | 8.60%                                                                         | 12.64%                                                            |
| Any Antiviral                  | 3.18%                                                                      | 7.96%                                                                         | 5.78%                                                             | Dopamine                             | 2.07%                                                                      | 7.42%                                                                         | 7.02%                                                             |
| Any Antifungal                 | 2.20%                                                                      | 15.99%                                                                        | 13.85%                                                            | Dobutamine                           | 0.17%                                                                      | 3.48%                                                                         | 2.86%                                                             |
|                                |                                                                            |                                                                               |                                                                   | Epinephrine                          | 1.02%                                                                      | 10.00%                                                                        | 14.38%                                                            |
| <b><u>Immunomodulation</u></b> |                                                                            |                                                                               |                                                                   | Esmolol                              | 0.30%                                                                      | 2.69%                                                                         | 1.72%                                                             |
| Dexamethasone                  | 9.45%                                                                      | 13.66%                                                                        | 9.43%                                                             | Isoproterenol                        | 0.02%                                                                      | 0.07%                                                                         | 0.08%                                                             |
| Prednisone                     | 7.76%                                                                      | 16.42%                                                                        | 10.15%                                                            | Milrinone                            | 0.04%                                                                      | 1.11%                                                                         | 0.61%                                                             |
| Methylprednisolone             | 4.42%                                                                      | 21.15%                                                                        | 16.00%                                                            | Norepinephrine                       | 0.44%                                                                      | 14.66%                                                                        | 11.89%                                                            |
| Hydrocortisone                 | 1.00%                                                                      | 14.34%                                                                        | 18.31%                                                            | Phenylephrine                        | 1.04%                                                                      | 12.87%                                                                        | 10.20%                                                            |
| Any systemic steroid           | 35.83%                                                                     | 67.46%                                                                        | 56.21%                                                            | Vasopressin                          | 1.04%                                                                      | 12.87%                                                                        | 10.20%                                                            |
| Anakinra                       | 0.05%                                                                      | 0.04%                                                                         | 0.13%                                                             | ECMO                                 | 0.00%                                                                      | 5.02%                                                                         | 2.49%                                                             |
| Tocilizumab                    | 0.78%                                                                      | 13.55%                                                                        | 6.33%                                                             | CRRT or HD                           | 1.53%                                                                      | 9.75%                                                                         | 9.59%                                                             |

eTable 6: Machine Learning Model Performance Metrics

This table shows performance metrics for each machine learning model type over Inpatient stays ending between January 2020 and November 2020. Mar-May = March to May 2020. Jun-Oct = June to October 2020. AUROC = area under the receiver operator characteristic curve.

|                                         |         | Random Forest | XGBoost | Support Vector Machines | Logistic Regression |        |        |
|-----------------------------------------|---------|---------------|---------|-------------------------|---------------------|--------|--------|
|                                         |         |               |         |                         | None                | L1     | L2     |
| Balanced Accuracy                       | All     | 67.90%        | 70.90%  | 62.40%                  | 65.80%              | 65.20% | 65.90% |
|                                         | Jun-Oct | 64.80%        | 68.20%  | 60.30%                  | 63.20%              | 62.90% | 63.60% |
|                                         | Mar-May | 70.40%        | 73.20%  | 64.10%                  | 68.00%              | 67.20% | 67.90% |
| F1                                      | All     | 51.70%        | 56.50%  | 39.70%                  | 47.00%              | 45.80% | 47.30% |
|                                         | Jun-Oct | 43.80%        | 49.50%  | 33.80%                  | 40.00%              | 39.40% | 40.90% |
|                                         | Mar-May | 57.30%        | 61.90%  | 44.30%                  | 52.40%              | 50.90% | 52.20% |
| Positive Predictive Value/<br>Precision | All     | 78.70%        | 73.00%  | 79.80%                  | 70.00%              | 70.50% | 69.60% |
|                                         | Jun-Oct | 69.00%        | 63.50%  | 71.00%                  | 60.30%              | 61.70% | 60.80% |
|                                         | Mar-May | 86.20%        | 80.40%  | 85.90%                  | 76.30%              | 76.40% | 75.10% |
| AUROC                                   | All     | 87.00%        | 87.40%  | 83.20%                  | 83.80%              | 83.80% | 83.80% |
|                                         | Jun-Oct | 86.40%        | 86.10%  | 81.90%                  | 83.30%              | 83.20% | 83.40% |
|                                         | Mar-May | 87.90%        | 89.20%  | 85.10%                  | 85.10%              | 85.20% | 85.00% |
| Recall/<br>Sensitivity                  | All     | 38.50%        | 46.10%  | 26.50%                  | 35.40%              | 33.90% | 35.80% |
|                                         | Jun-Oct | 32.10%        | 40.60%  | 22.20%                  | 29.90%              | 28.90% | 30.80% |
|                                         | Mar-May | 42.90%        | 50.30%  | 29.80%                  | 39.90%              | 38.20% | 40.00% |

## eFigures

eFigure 1: Cohort Construction

This Sankey plot shows how the cohort accumulated from the N3C sites. The left vertical axis shows the number of patients ( $M = 1,000,000$ ). Each site has a color. The width of the arrows corresponds to the number of patients from that site. Two sites did not submit sufficient date information for us to calculate the N3C computable phenotypes (publicly available on GitHub<sup>22</sup>), excluded as noted “FALSE” in the middle column. We then excluded a) sites who did not submit sufficient death and ventilation information and b) children < 18 years old (“removed from study”), and c) sites whose patients were overwhelmingly children. We show laboratory-confirmed positive as “PCR pos” in this plot due to limited space, but <5% of the patients at one site were included with SARS-CoV-2 antigen positivity. The remainder had positive SARS-CoV-2 polymerase chain reaction (PCR) tests. See Methods for details.

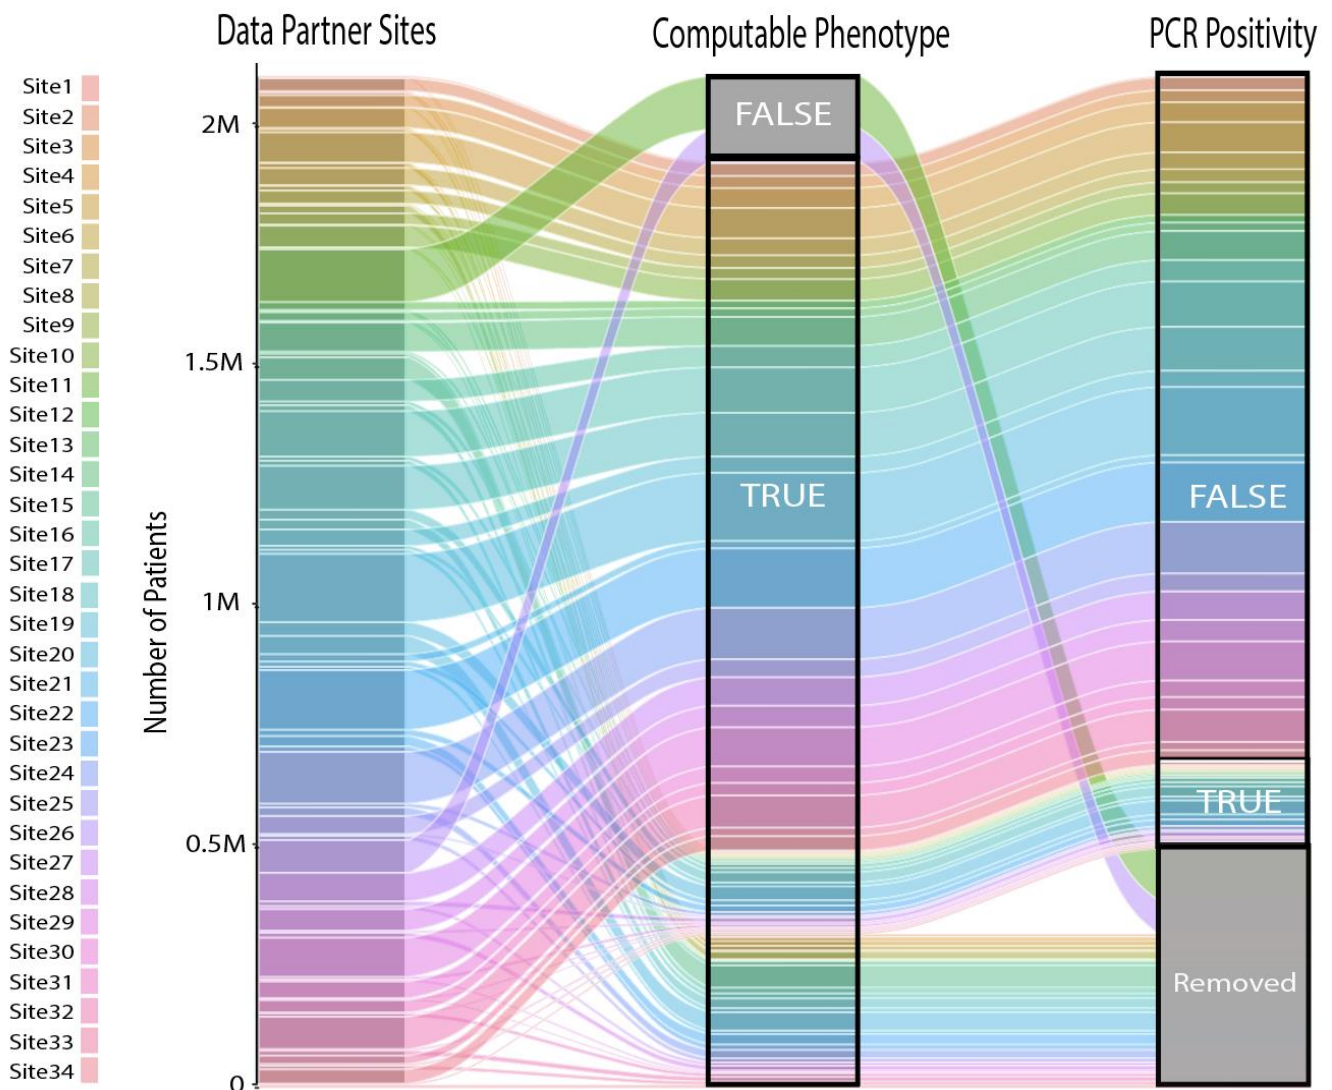

eFigure 2: Age, Sex, Race, and Ethnicity Distributions of the overall N3C Cohort

This figure shows the age, sex, race, and ethnicity distributions of the overall N3C cohort, stratified by the N3C phenotype groups (publicly available on GitHub[c]). Racial and ethnic minorities are well-represented. COVID = coronavirus disease.

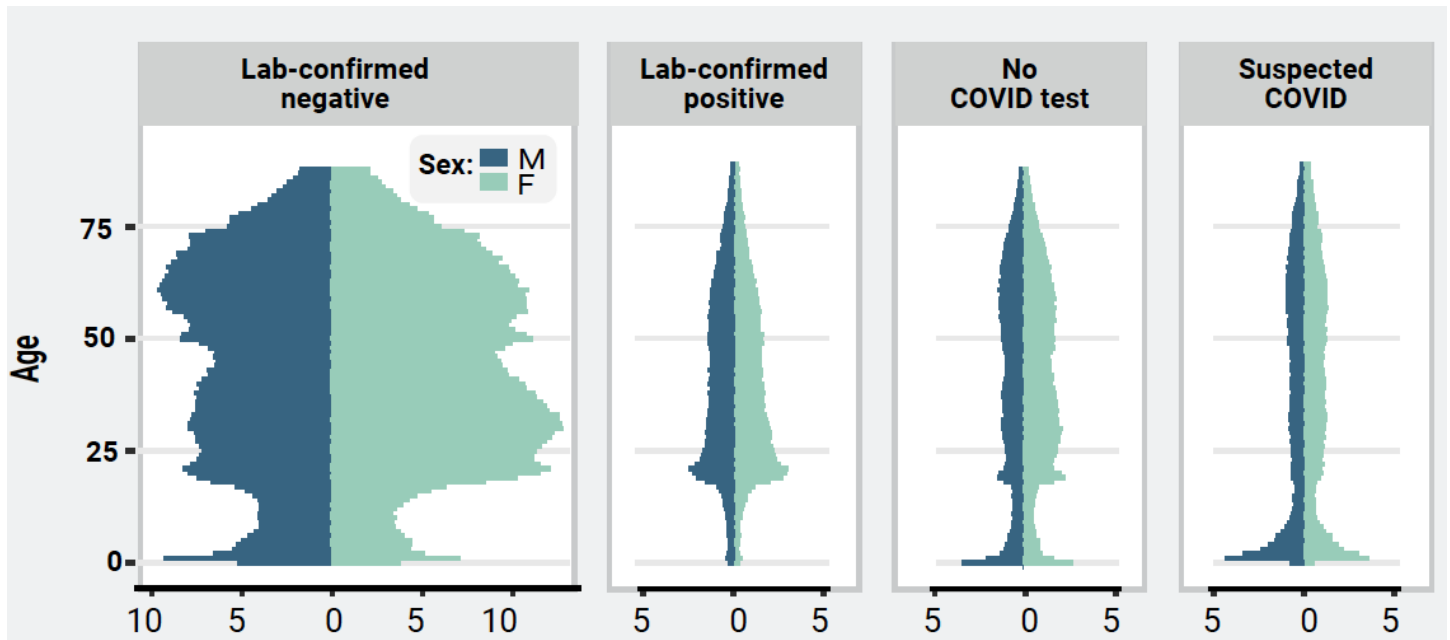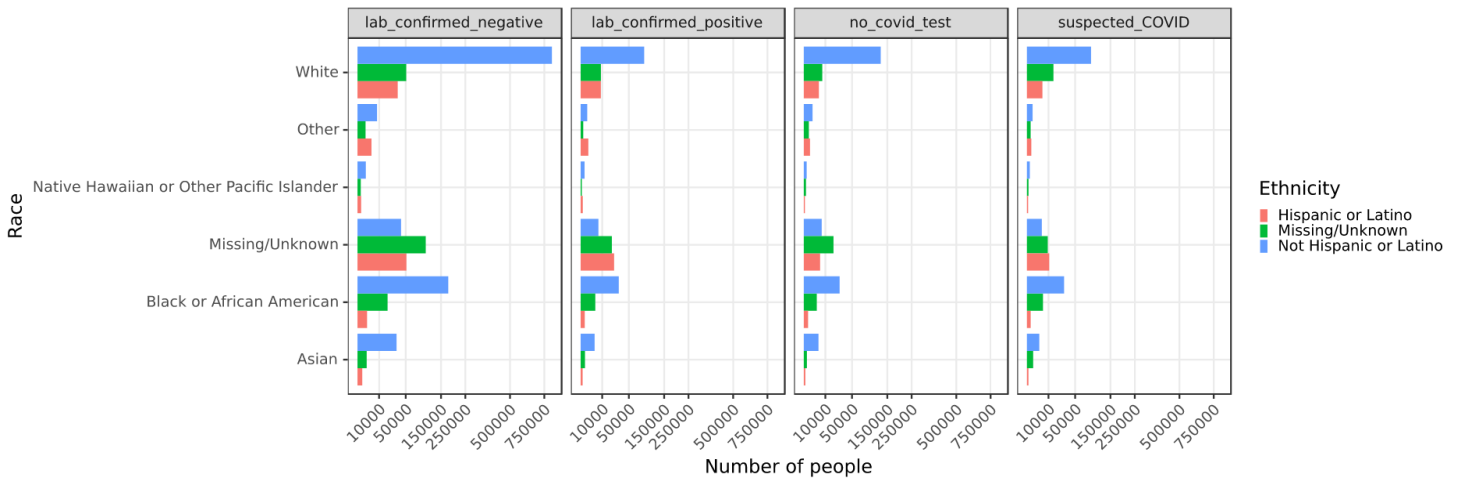

### eFigure 3: Trajectories of Additional Laboratory Tests During a Hospital Encounter

This figure shows the median (line) and interquartile range (bars) of each laboratory test on each hospital day, stratified by patient maximum severity (hospital mortality or discharge to hospice [black], invasive ventilation or extracorporeal membrane oxygenation [red], hospitalized without any of those [yellow], or emergency department visit only [green], see Table 1). ALT = alanine aminotransferase. AST = aspartate aminotransferase. BUN = blood urea nitrogen. Sed. = sedimentation (erythrocyte sedimentation rate). IL-6 = interleukin-6. NTproBNP = N-Terminal-prohormone B-type Natriuretic Peptide. We tested trajectory differences between severity groups using one-way ANOVA at day 7, see manuscript text.

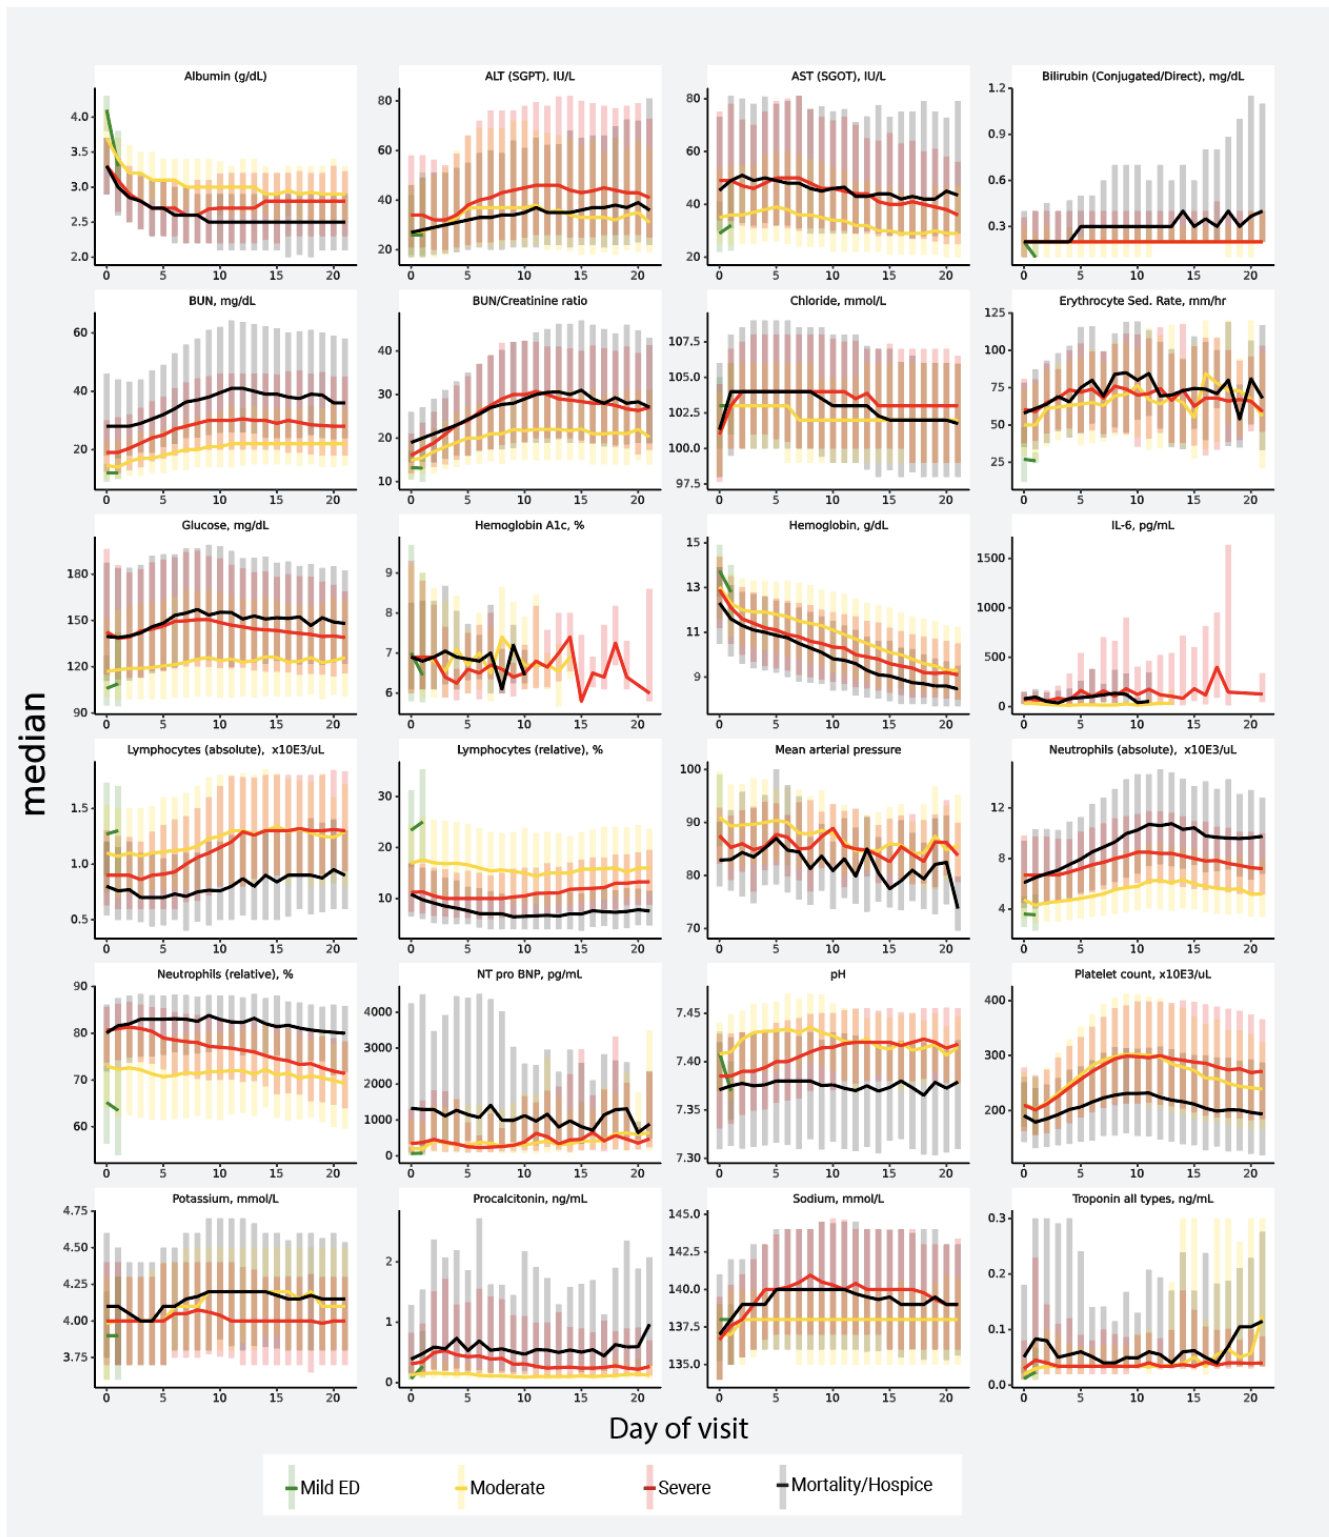

**eFigure 4.** Heatmaps showing Nadir, Average, and Peak Values of Vital Signs, Body Size Metrics, and Laboratory Test Values, by Severity Group



a: Heatmap showing Nadir, Average, and Peak Values of Vital signs and Body Size Metrics, by Severity Group

Values shown for each vital sign and body size metric for each severity group are multiples of the interquartile range (IQR) away from the median value. Circle diameter corresponds to the number of IQRs away from the median, with blue representing below the median and red representing above the median.

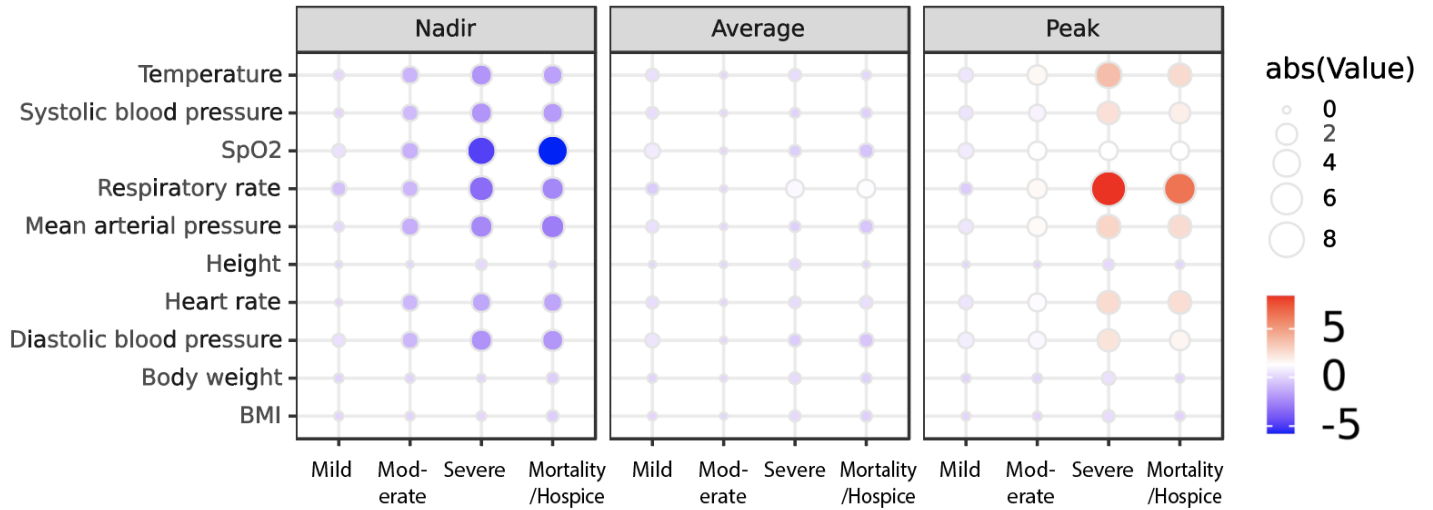

b: Heatmap showing Nadir, Average, and Peak Values of Laboratory Test Values, by Severity Group

Values shown for each laboratory test for each severity group are multiples of the interquartile range (IQR) away from the median value. Circle diameter corresponds to the number of IQRs away from the median, with blue representing below the median and red representing above the median. ALT = alanine aminotransferase. AST = aspartate aminotransferase. BUN = blood urea nitrogen. Sed. = sedimentation (erythrocyte sedimentation rate). IL-6 = interleukin-6. NTproBNP = N-Terminal-prohormone B-type Natriuretic Peptide.

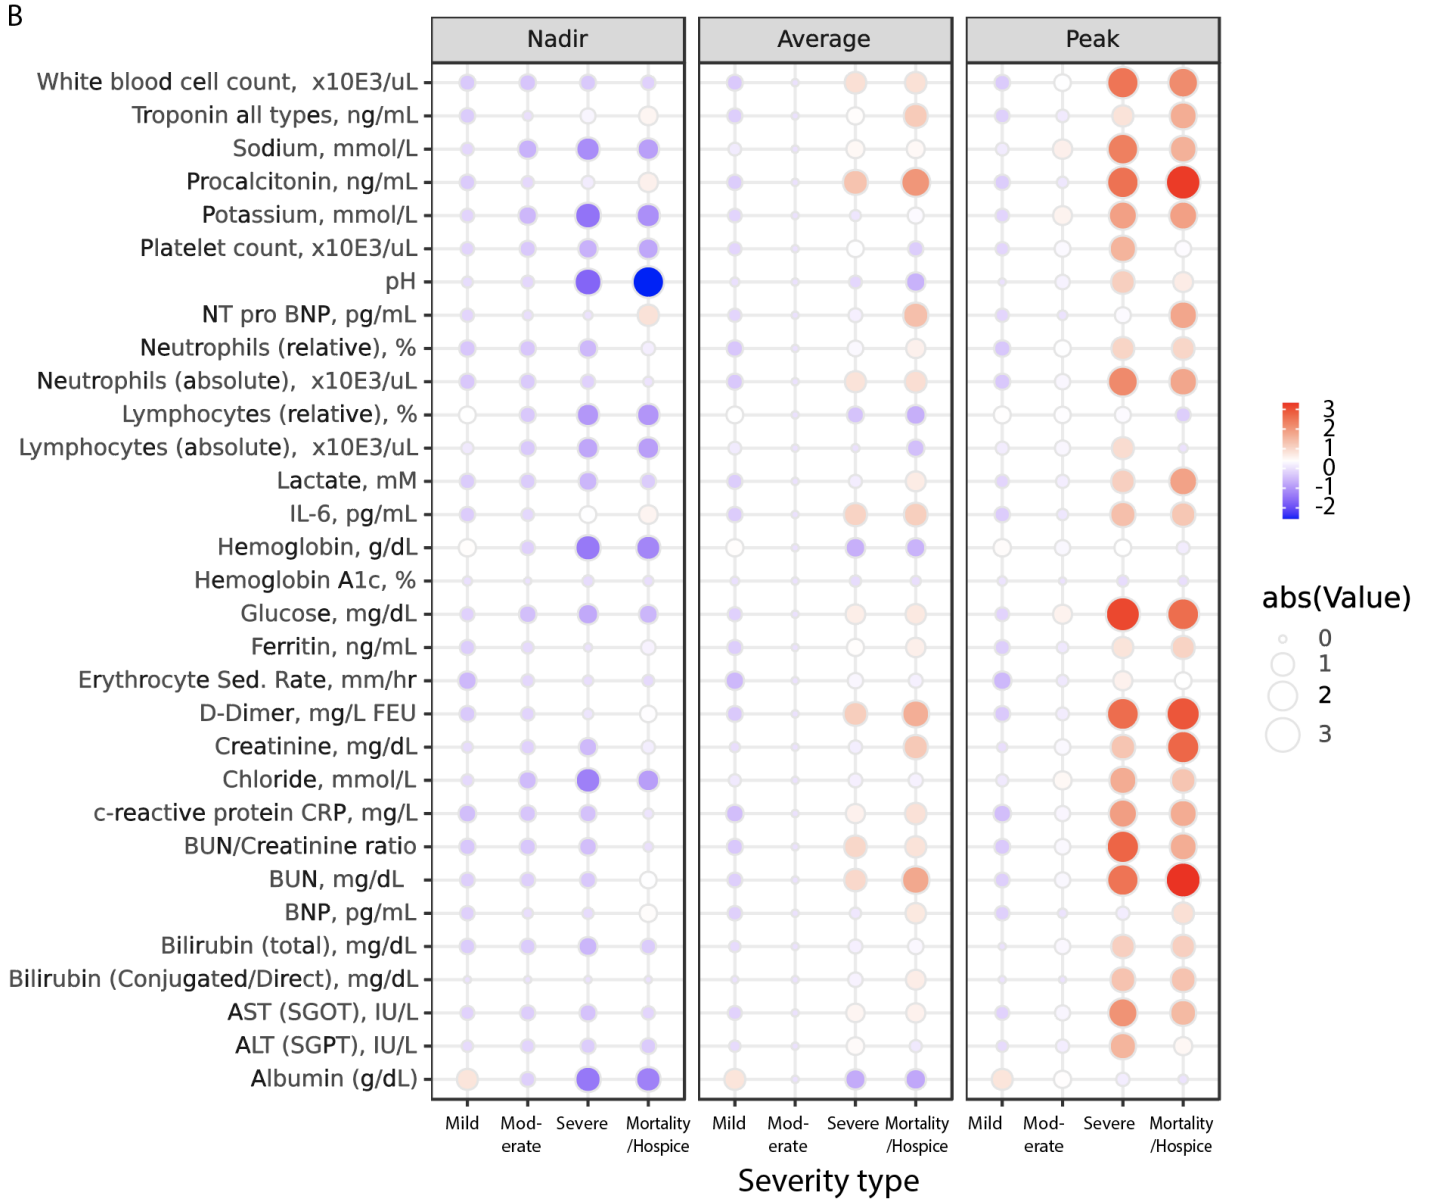

eFigure 5: Relatively Few Patients have Harmonized Blood Type

This sunburst plot<sup>25</sup> is read from inside out. Each arc length corresponds to the proportion of that circle represented by that category. Composite patterns are shown as adjacent segments (inside to out), e.g. known blood type, type A, and positive Rh antigen. ED = Emergency Department. Neg = Rh negative. Pos = Rh positive. Stratification is by severity group.

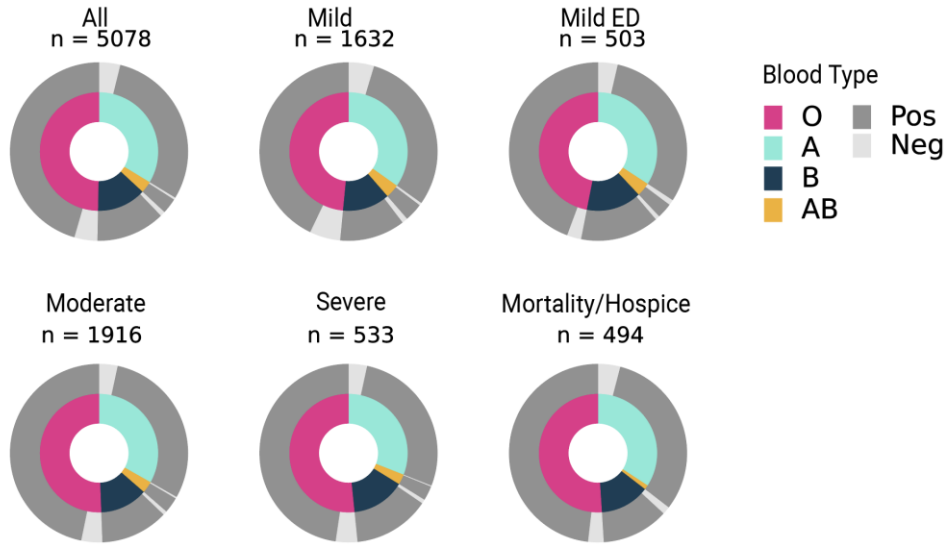

**eFigure 6.** Antimicrobial Treatments and Immunomodulatory Treatments in Hospitalized Patients

**A:** This sunburst plot<sup>25</sup> is read from inside to outside. Each arc length corresponds to the proportion of that circle represented by that category. Composite treatment regimens are shown as adjacent segments (inside to out, e.g. systemic antibiotic yes, azithromycin yes, hydroxychloroquine yes). Stratification is by severity group.

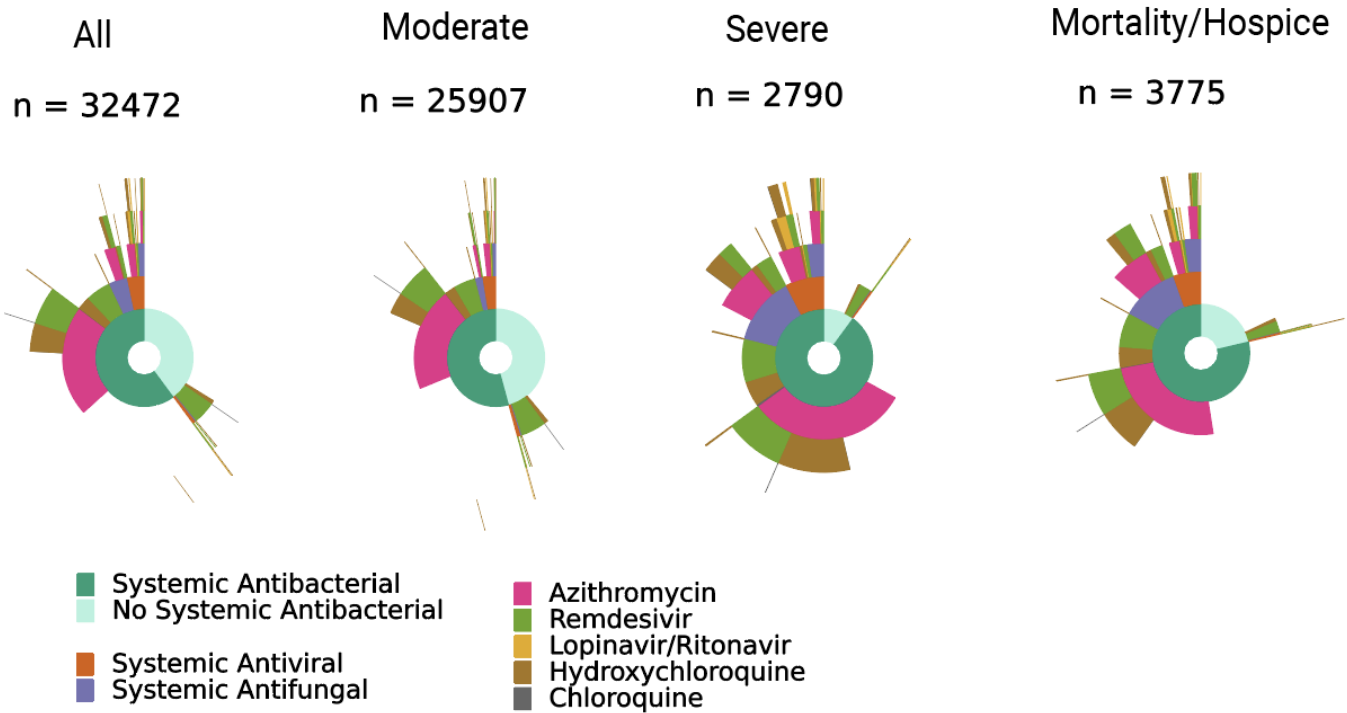

**B:** This sunburst plot is read from inside to outside.<sup>25</sup> Each arc length corresponds to the proportion of that circle represented by that category. Composite treatment regimens are shown as adjacent segments (inside to out, e.g. systemic corticosteroid yes, dexamethasone yes, anakinra yes). Stratification is by severity group.

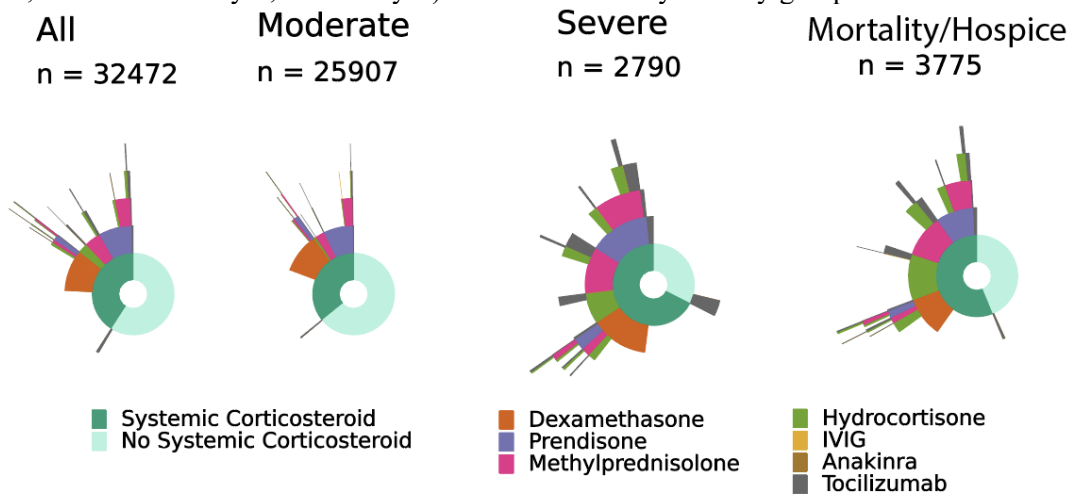

**eFigure 7 Title: Area Under the Receiver Operator Characteristic (AUROC) Curves for First-Day Machine Learning Models to Predict Subsequent Clinical Severity**

**eFigure 7 Legend:** AUC = AUROC. SVM = support vector machines. Logistic regression is shown with no penalization and L1 and L2 penalization. See Methods for details.

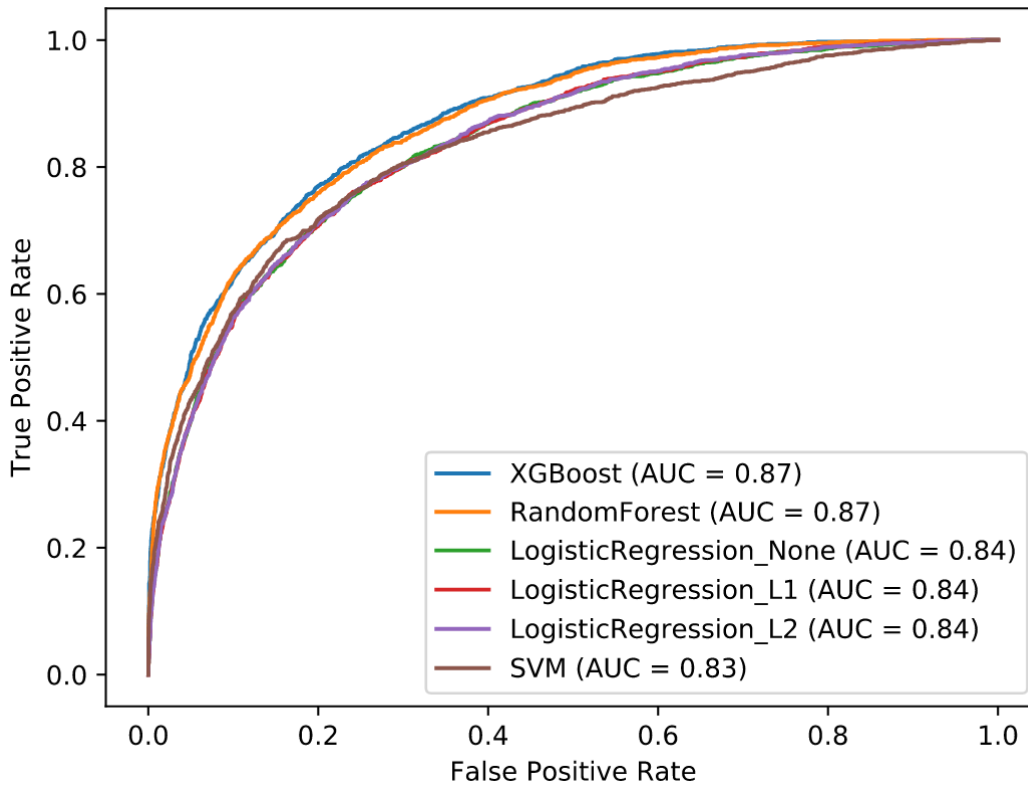

**eFigure 8. Variable Importance in the Machine Learning Models Predicting Clinical Severity**

The 64 machine learning (ML) model input variables are listed by their mean variable importance rank across ML model types. Each column is a ML model type. Logistic regression is shown without penalization and with L1 and L2 penalties. The table cells show a heat map with darkest (blue) representing highest variable importance and lightest (teal) representing lower variable importance. See Methods and Supplemental Methods for details about variable definitions, model construction, and testing. NTproBNP = N-Terminal-prohormone B-type Natriuretic Peptide.

| Variable                                      | Logistic Regression |          |      |    |    | Mean |
|-----------------------------------------------|---------------------|----------|------|----|----|------|
|                                               | Random Forest       | XG Boost | None | L1 | L2 |      |
| pH                                            | 0                   | 0        | 1    | 1  | 1  | 0.6  |
| Age at visit start (years)                    | 3                   | 4        | 0    | 0  | 0  | 1.4  |
| Respiratory rate                              | 5                   | 3        | 2    | 2  | 2  | 2.8  |
| Oxygen saturation (SpO2)                      | 2                   | 2        | 6    | 5  | 3  | 3.6  |
| Blood urea nitrogen (BUN)                     | 1                   | 1        | 13   | 11 | 9  | 7    |
| Systolic blood pressure (SBP)                 | 9                   | 12       | 5    | 4  | 5  | 7    |
| Aspartate aminotransferase (AST)              | 6                   | 6        | 3    | 10 | 11 | 7.2  |
| Albumin                                       | 21                  | 7        | 9    | 6  | 6  | 9.8  |
| Ethnicity = missing or unknown                | 43                  | 5        | 4    | 3  | 4  | 11.8 |
| C-reactive protein (CRP)                      | 16                  | 14       | 14   | 9  | 10 | 12.6 |
| Lactate                                       | 20                  | 18       | 11   | 7  | 8  | 12.8 |
| Absolute neutrophil count                     | 11                  | 27       | 12   | 8  | 7  | 13   |
| Glucose                                       | 4                   | 23       | 21   | 16 | 15 | 15.8 |
| Platelet count                                | 10                  | 28       | 16   | 13 | 14 | 16.2 |
| Sodium                                        | 13                  | 17       | 17   | 19 | 16 | 16.4 |
| Hemoglobin                                    | 12                  | 31       | 18   | 15 | 18 | 18.8 |
| Diastolic blood pressure (DBP)                | 17                  | 11       | 28   | 20 | 19 | 19   |
| Troponin                                      | 15                  | 9        | 29   | 23 | 21 | 19.4 |
| B-type natriuretic peptide (BNP)              | 32                  | 21       | 19   | 14 | 13 | 19.8 |
| Sex = male                                    | 40                  | 38       | 15   | 12 | 12 | 23.4 |
| Body weight                                   | 19                  | 41       | 23   | 18 | 20 | 24.2 |
| Charlson Dementia                             | 37                  | 8        | 31   | 24 | 23 | 24.6 |
| Temperature                                   | 26                  | 32       | 24   | 21 | 22 | 25   |
| Erythrocyte sedimentation rate (ESR)          | 36                  | 40       | 20   | 17 | 17 | 26   |
| D-dimer                                       | 25                  | 34       | 33   | 25 | 25 | 28.4 |
| Ferritin                                      | 23                  | 36       | 35   | 28 | 26 | 29.6 |
| Creatinine                                    | 8                   | 53       | 27   | 34 | 27 | 29.8 |
| Bilirubin conjugated                          | 35                  | 25       | 32   | 27 | 31 | 30   |
| Absolute lymphocyte count                     | 14                  | 20       | 43   | 41 | 35 | 30.6 |
| Bilirubin total                               | 28                  | 49       | 36   | 22 | 24 | 31.8 |
| Body mass index                               | 27                  | 46       | 34   | 26 | 30 | 32.6 |
| Charlson Diabetes mellitus                    | 41                  | 42       | 30   | 29 | 28 | 34   |
| Potassium                                     | 22                  | 54       | 38   | 30 | 29 | 34.6 |
| Hemoglobin - glycosylated (A1C)               | 33                  | 45       | 40   | 35 | 32 | 37   |
| White blood cell count                        | 7                   | 10       | 63   | 49 | 62 | 38.2 |
| Charlson Congestive heart failure             | 45                  | 37       | 37   | 38 | 34 | 38.2 |
| Charlson Myocardial Infarction                | 51                  | 30       | 41   | 36 | 33 | 38.2 |
| Race = missing or unknown                     | 47                  | 51       | 7    | 49 | 39 | 38.6 |
| Alamine aminotransferase (ALT)                | 24                  | 44       | 22   | 49 | 55 | 38.8 |
| Charlson Metastases                           | 56                  | 13       | 48   | 32 | 45 | 38.8 |
| Charlson Renal Disease                        | 44                  | 26       | 44   | 40 | 41 | 39   |
| Ethnicity = not Hispanic or Latino            | 39                  | 29       | 26   | 49 | 54 | 39.4 |
| Procalcitonin                                 | 29                  | 19       | 55   | 49 | 48 | 40   |
| Heart rate                                    | 30                  | 35       | 50   | 42 | 44 | 40.2 |
| Race = white                                  | 38                  | 52       | 8    | 49 | 57 | 40.8 |
| Charlson Q Score                              | 31                  | 22       | 54   | 49 | 50 | 41.2 |
| Race = Black or African-American              | 42                  | 57       | 10   | 49 | 49 | 41.4 |
| Chloride                                      | 18                  | 47       | 39   | 49 | 59 | 42.4 |
| Race = Asian                                  | 54                  | 43       | 49   | 33 | 36 | 43   |
| Charlson Liver Disease (severe)               | 59                  | 24       | 51   | 37 | 46 | 43.4 |
| NTproBNP                                      | 34                  | 33       | 53   | 48 | 52 | 44   |
| Charlson Cancer                               | 52                  | 58       | 42   | 31 | 37 | 44   |
| Charlson Stroke                               | 49                  | 56       | 47   | 43 | 40 | 47   |
| Race = other                                  | 61                  | 61       | 25   | 46 | 43 | 47.2 |
| Charlson Diabetes mellitus with complications | 50                  | 16       | 60   | 49 | 63 | 47.6 |
| Charlson hemiplegia or paralysis              | 58                  | 15       | 62   | 49 | 61 | 49   |
| Charlson Peripheral vascular disease          | 46                  | 39       | 56   | 49 | 56 | 49.2 |
| Charlson HIV                                  | 62                  | 60       | 45   | 44 | 38 | 49.8 |
| Sex = other                                   | 63                  | 61       | 46   | 39 | 42 | 50.2 |
| Charlson Liver Disease (mild)                 | 53                  | 48       | 52   | 47 | 53 | 50.6 |
| Charlson Rheumatologic disease                | 55                  | 55       | 57   | 49 | 51 | 53.4 |
| Charlson Peptic Ulcer Disease                 | 57                  | 50       | 59   | 49 | 58 | 54.6 |
| Charlson Pulmonary disease                    | 48                  | 59       | 58   | 49 | 60 | 54.8 |
| Race = Native Hawaiian or Pacific Islander    | 60                  | 61       | 61   | 45 | 47 | 54.8 |

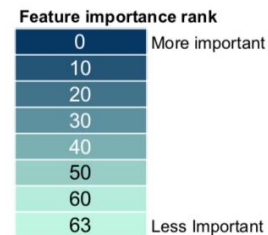

## SUPPLEMENTAL REFERENCES

- 1 Taylor L. FedRAMP: History and Future Direction. *IEEE Cloud Computing* 2014; **1**: 10–4.
- 2 Welcome to Python.org. <https://www.python.org/> (accessed Nov 5, 2020).
- 3 Ripley BD. The R project in statistical computing. *MSOR Connections The newsletter of the LTSN Maths* 2001. <http://citeseerx.ist.psu.edu/viewdoc/download?doi=10.1.1.430.3979&rep=rep1&type=pdf>.
- 4 ISO/IEC 9075-1:2016. 2018. <https://www.iso.org/standard/63555.html> (accessed Nov 5, 2020).
- 5 Java Software. <http://oracle.com/java> (accessed Dec 20, 2020).
- 6 Apache Spark™ - Unified Analytics Engine for Big Data. <https://spark.apache.org/> (accessed Nov 5, 2020).
- 7 Fleurence RL, Curtis LH, Califf RM, Platt R, Selby JV, Brown JS. Launching PCORnet, a national patient-centered clinical research network. *J Am Med Inform Assoc* 2014; **21**: 578–82.
- 8 FitzHenry F, Resnic FS, Robbins SL, *et al*. Creating a Common Data Model for Comparative Effectiveness with the Observational Medical Outcomes Partnership. *Appl Clin Inform* 2015; **6**: 536–47.
- 9 Visweswaran S, Becich MJ, D'Itri VS, *et al*. Accrual to Clinical Trials (ACT): A Clinical and Translational Science Award Consortium Network. *JAMIA Open* 2018; **1**: 147–52.
- 10 Topaloglu U, Palchuk MB. Using a Federated Network of Real-World Data to Optimize Clinical Trials Operations. *JCO Clin Cancer Inform* 2018; **2**: 1–10.
- 11 Haendel M, Chute C, Gersing K. The National COVID Cohort Collaborative (N3C): Rationale, Design, Infrastructure, and Deployment. *J Am Med Inform Assoc* 2020; published online Aug 17. DOI:10.1093/jamia/ocaa196.
- 12 Quan H, Li B, Couris CM, *et al*. Updating and validating the Charlson comorbidity index and score for risk adjustment in hospital discharge abstracts using data from 6 countries. *Am J Epidemiol* 2011; **173**: 676–82.
- 13 Wasey, JO Lang, M and R Core Team. icd: Comorbidity Calculations and Tools for ICD-9 and ICD-10 Codes. 2020; published online May 31. <https://rdr.io/cran/icd/> (accessed Dec 18, 2020).
- 14 WHO. Anatomical Therapeutic Chemical (ATC) classification. [https://www.whocc.no/atc\\_ddd\\_index\\_and\\_guidelines/atc\\_ddd\\_index/](https://www.whocc.no/atc_ddd_index_and_guidelines/atc_ddd_index/) (accessed Dec 15, 2020).
- 15 Venkataraman S, Yang Z, Liu D, *et al*. SparkR: Scaling R Programs with Spark. In: Proceedings of the 2016 International Conference on Management of Data. New York, NY, USA: Association for Computing Machinery, 2016: 1099–104.
- 16 pyspark package — PySpark 3.0.1 documentation. <https://spark.apache.org/docs/latest/api/python/pyspark.html> (accessed Dec 18, 2020).
- 17 Pedregosa F, Varoquaux G, Gramfort A, *et al*. Scikit-learn: Machine Learning in Python. *J Mach Learn Res* 2011; **12**: 2825–30.
- 18 Create Elegant Data Visualisations Using the Grammar of Graphics. <https://ggplot2.tidyverse.org/index.html> (accessed Nov 5, 2020).
- 19 Brunson J. ggalluvial: Layered Grammar for Alluvial Plots. *J Open Source Softw* 2020; **5**: 2017.

- 20 Campitelli E. ggnewscale: Multiple Fill and Colour Scales in ‘ggplot2’. R package version 0.4.4. 2020; published online Dec 2. <https://CRAN.R-project.org/package=ggnewscale> (accessed Dec 18, 2020).
- 21 Hunter JD. Matplotlib: A 2D Graphics Environment. *Computing in Science Engineering* 2007; **9**: 90–5.
- 22 Phenotype\_Data\_Acquisition. Github [https://github.com/National-COVID-Cohort-Collaborative/Phenotype\\_Data\\_Acquisition](https://github.com/National-COVID-Cohort-Collaborative/Phenotype_Data_Acquisition) (accessed Nov 5, 2020).
- 23 Hripcsak G, Duke JD, Shah NH, *et al.* Observational Health Data Sciences and Informatics (OHDSI): Opportunities for Observational Researchers. *Stud Health Technol Inform* 2015; **216**: 574–8.
- 24 WHO Working Group on the Clinical Characterisation and Management of COVID-19 infection. A minimal common outcome measure set for COVID-19 clinical research. *Lancet Infect Dis* 2020; **20**: e192–7.
- 25 Hripcsak G, Ryan PB, Duke JD, *et al.* Characterizing treatment pathways at scale using the OHDSI network. *Proc Natl Acad Sci U S A* 2016; **113**: 7329–36.
