# Supplementary material for: Clinical Characterization and Prediction of Clinical Severity of SARS-CoV-2 Infection Among US Adults Using Data From the US National COVID Cohort Collaborative
Source: PubMed Central journal article supplement (PMC8278272; doi:10.1001/jamanetworkopen.2021.16901), 2021-07-13
Supplement: jamanetwopen-e2116901-s002.pdf [file jamanetwopen-e2116901-s002.pdf]

**\*Group Name(s): The National COVID Cohort Collaborative (N3C) Consortium**

| <b>*First Name and Middle Initial(s)</b> | <b>*Last Name</b> | <b>*Suffix (eg, Jr, III)</b> | <b>Academic Degrees</b> | <b>Institution</b>                                             |
|------------------------------------------|-------------------|------------------------------|-------------------------|----------------------------------------------------------------|
| Joel                                     | Gagnier           |                              | BA, MS, PhD, ND         | The University of Michigan at Ann Arbor                        |
| Siqing                                   | Hu                |                              | BS, MS                  | The University of Michigan at Ann Arbor                        |
| Kanchan                                  | Lota              |                              | MPH                     | The University of Michigan at Ann Arbor                        |
| Sarah                                    | Maidlow           |                              | AA                      | The University of Michigan at Ann Arbor                        |
| David A.                                 | Hanauer           |                              | MS, MD                  | University of Michigan                                         |
| Kevin                                    | Weatherwax        |                              | CCRC, CCRA              | University of Michigan–Ann Arbor                               |
| Nikhila                                  | Gandrakota        |                              | MPH, MBBS               | Emory University                                               |
| Rishikesan                               | Kamaleswaran      |                              | PhD                     | Emory University School of Medicine                            |
| Greg                                     | Martin            |                              | MS, MD                  | Emory University                                               |
| Jingjing                                 | Qian              |                              | PhD                     | Auburn University, Auburn, AL                                  |
| Jason E.                                 | Farley            |                              | MPH, PhD, RN, NP        | School of Nursing, Johns Hopkins University, Baltimore, MD USA |
| Patricia A.                              | Francis           |                              | MS, MA                  | Johns Hopkins University School of Medicine                    |
| Dazhi                                    | Jiao              |                              | MS                      | Johns Hopkins University School of Medicine                    |

|           |          |          |                                                                                            |
|-----------|----------|----------|--------------------------------------------------------------------------------------------|
| Hadi      | Kharrazi | PhD, MD  | Johns Hopkins School of Public Health                                                      |
| Justin T. | Reese    | PhD      | Environmental Genomics and Systems Biology Division, Lawrence Berkeley National Laboratory |
| Mariam    | Deacy    | MD       | National Center for Advancing Translational Sciences, National Institutes of Health        |
| Usman     | Sheikh   | MBA      | National Center for Advancing Translational Sciences, National Institutes of Health        |
| Jake      | Chen     | PhD      | University of Alabama at Birmingham                                                        |
| Michael   | Patton   | BA       | University of Alabama at Birmingham                                                        |
| Thomas    | Ramsey   | PhD      | University of Alabama at Birmingham                                                        |
| Jasvinder | Singh    | MS, MBBS | University of Alabama at Birmingham                                                        |
| James J.  | Cimino   | MD       | University of Alabama-Birmingham                                                           |
| Jing      | Su       | PhD      | Indiana University                                                                         |
| William G | Adams    | MD       | Boston University, /Boston Medical Center, Boston, MA, USA                                 |
| Tim       | Duong    | PhD      | Albert Einstein College of Medicine, Bronx, NY, USA                                        |

|                 |           |                 |                                                                                                 |
|-----------------|-----------|-----------------|-------------------------------------------------------------------------------------------------|
| John B.         | Buse      | MD, PhD         | University of North Carolina School of Medicine                                                 |
| Jessica Yasmine | Islam     | MPH, PhD        | University of North Carolina at Chapel Hill                                                     |
| Jihad S.        | Obeid     | MD              | Department of Public Health Sciences, Medical University of South Carolina, Charleston, SC, USA |
| Stephane        | Meystre   | PhD, MD         | Medical University of South Carolina, Charleston, SC, USA                                       |
| Steve           | Patterson | BS              | University of Virginia                                                                          |
| Misha           | Zemmel    | MS              | University of Virginia                                                                          |
| Ron             | Grider    | BS              | University of Virginia, Charlottesville, VA, USA                                                |
| Ashley          | Martinez  | MS, PhD, PharmD | Rush University Medical Center                                                                  |
| Carlos          | Santos    | MD, MPHS        | Rush University Medical Center                                                                  |
| Julian          | Solway    | MD              | University of Chicago                                                                           |
| Ryan            | Chiu      | BS              | University of Illinois at Chicago                                                               |
| Gerald B.       | Brown     | NA              | University of Texas Medical Branch at Galveston                                                 |
| Jiafeng         | Cui       | BS              | University of Texas Medical Branch at Galveston                                                 |

|                |           |              |                                                                                                                                  |
|----------------|-----------|--------------|----------------------------------------------------------------------------------------------------------------------------------|
| Sharon         | Liang     | MS, MD       | University of Texas<br>Medical Branch at<br>Galveston                                                                            |
| Kamil          | Khanipov  | BS, PhD      | University of Texas<br>Medical Branch                                                                                            |
| Jeremy Richard | Harper    | MS           | Owl Health Works LLC,<br>Indianapolis, IN, USA                                                                                   |
| Peter J.       | Embi      | MS, MD       | Regenstrief Institute,<br>Indianapolis, IN, USA                                                                                  |
| David A.       | Eichmann  | BS, MS, PhD  | School of Library and<br>Information Science, The<br>University of Iowa                                                          |
| Boyd M.        | Knosp     | MS           | University of Iowa Institute<br>for Clinical and<br>Translational Science,<br>The University of Iowa                             |
| William        | Hillegass | MPH, PhD, MD | University of Mississippi<br>Medical Center, Jackson,<br>MS, USA                                                                 |
| Chunlei        | Wu        | PhD          | Department of Integrative<br>Structural and<br>Computational Biology,<br>The Scripps Research<br>Institute, La Jolla, CA,<br>USA |
| James          | Aaron     | MHA          | University of Kentucky                                                                                                           |
| Darren         | Henderson | BS           | University of Kentucky                                                                                                           |
| Muhammad       | Gul       | MD           | University of Kentucky                                                                                                           |

|          |             |             |                                                                     |
|----------|-------------|-------------|---------------------------------------------------------------------|
| Tamela   | Harper      | MHA         | University of Kentucky                                              |
| Daniel   | Harris      | PhD         | University of Kentucky                                              |
| Jeff     | Talbert     | PhD         | University of Kentucky                                              |
| Neil     | Bahroos     | MS, MBA     | University of Southern California, Los Angeles, CA, USA             |
| Steven   | Dubinett    | MD          | University of California, Los Angeles, Los Angeles, CA, USA         |
| Jomol    | Mathew      | PhD         | University of Wisconsin-Madison                                     |
| Gabriel  | McMahan     | BS          | University of Wisconsin-Madison, Madison, WI, USA                   |
| Hongfang | Liu         | PhD         | Mayo Clinic, Rochester, MN, USA                                     |
| Claudia  | Lucchinetti | MD          | Mayo Clinic, Rochester, MN, USA                                     |
| David L  | Schwartz    | MD          | The University of Tennessee Health Science Center, Memphis, TN, USA |
| Ralph    | Sacco       | BS, MS, MD  | University of Miami                                                 |
| Peyman   | Taghioff    | MS          | University of Miami                                                 |
| Diane    | Harper      | MS, MPH, MD | Michigan Medicine                                                   |
| Denise   | Angst       | PhD, RN     | Aurora Health, Milwaukee, WI, USA                                   |
| Andrew   | Marek       | BBA         | Aurora Health, Milwaukee, WI, USA                                   |

|                |                 |     |         |                                                               |
|----------------|-----------------|-----|---------|---------------------------------------------------------------|
| Carlos E.      | Figueroa Castro |     | MS, MD  | Medical College of Wisconsin, Milwaukee, WI, USA              |
| Bruce          | Blazar          |     | MD      | University of Minnesota, Minneapolis, MN, USA                 |
| Steven G.      | Johnson         |     | PhD     | University of Minnesota, Minneapolis, MN, USA                 |
| Melissa        | Basford         |     | MBA     | Vanderbilt University Medical Center                          |
| Laura          | Jones           |     | MPH     | Vanderbilt University Medical Center                          |
| Gordon         | Bernard         |     | BS, MD  | Vanderbilt University Medical Center, Nashville, TN, USA      |
| Rosalind       | Wright          |     | MPH, MD | Icahn School of Medicine at Mount Sinai                       |
| Joseph         | Finkelstein     |     | PhD, MD | Icahn School of Medicine at Mount Sinai, New York, NY, USA    |
| Thomas R.      | Campion         | Jr. | MS, PhD | Weill Cornell Medicine, Cornell University, New York, NY, USA |
| Christopher E. | Mason           |     | PhD     | Weill Cornell Medicine, Cornell University, New York, NY, USA |
| Xiaobo         | Fuld            |     | MS      | Weill Cornell Medicine                                        |
| Alfred         | Anzalone        |     | MS      | University of Nebraska Medical Center, Omaha, NE, USA         |

|           |               |          |                                                                                                   |
|-----------|---------------|----------|---------------------------------------------------------------------------------------------------|
| James C.  | McClay        | MD       | University of Nebraska<br>Medical Center, Omaha,<br>NE, USA                                       |
| Shyam     | Visweswaran   | PhD, MD  | Department of Biomedical<br>Informatics, University of<br>Pittsburgh                              |
| Connor    | Cook          | MA       | Oregon Clinical and<br>Translational Research<br>Institute, Oregon Health &<br>Science University |
| Alexandra | Dest          | MPH      | Oregon Health & Science<br>University                                                             |
| David     | Ellison       | BS, MD   | Oregon Health & Science<br>University                                                             |
| Rose      | Relevo        | BA       | Oregon Health & Science<br>University                                                             |
| Andrea M. | Volz          | BS       | Oregon Clinical and<br>Translational Research<br>Institute, Oregon Health &<br>Science University |
| Chengda   | Zhang         | MD       | Oregon Health & Science<br>University                                                             |
| Martha    | Tenzer        | BA       | Carilion Clinic                                                                                   |
| David S.  | Bowers        | BA       | Carilion Clinic, Roanoke,<br>VA, USA                                                              |
| Francis   | Farrell       | PhD      | Carilion Clinic, Roanoke,<br>VA, USA                                                              |
| Qiuyuan   | Qin           | MS, PhD  | University of Rochester<br>Medical Center                                                         |
| Martin    | Zand          | PhD, MD  | University of Rochester<br>Medical Center                                                         |
| Jeanne    | Holden-Wiltse | MPH, MBA | University of Rochester                                                                           |

|             |            |                |                                                                                             |
|-------------|------------|----------------|---------------------------------------------------------------------------------------------|
| Ramkiran    | Gouripeddi | MS, MD         | University of Utah, Salt Lake City, UT, USA                                                 |
| Julio       | Facelli    | PhD            | University of Utah                                                                          |
| Robert      | Clark      | MD             | University of Texas Health Science Center at San Antonio, San Antonio, TX, USA              |
| Benjamin    | Becerra    | PhD, MD        | California State University, San Bernardino, San Bernadino, CA, USA                         |
| Yao         | Yan        | BS             | Molecular Engineering & Sciences Institute, University of Washington, Seattle               |
| Jimmy       | Phuong     | PhD            | School of Medicine, Division of Biomedical and Health Informatics, University of Washington |
| Yooree      | Chae       | MS             | Sage Bionetworks                                                                            |
| Rena C.     | Patel      | MPH, MD, MPhil | University of Washington                                                                    |
| Christine   | Suver      | PhD            | Sage Bionetworks                                                                            |
| Elizabeth   | Zampino    | MS             | University of Washington                                                                    |
| Ahmed S.    | Said       | PhD, MD        | Washington University in St. Louis, St. Louis, MO, USA                                      |
| Philip R.O. | Payne      | PhD            | Institute for Informatics, Washington University in St. Louis, Saint Louis, MO, USA         |
| Randeep     | Jawa       | MD             | Stony Brook Medicine                                                                        |



|           |          |         |                                                                                                                                                                                   |
|-----------|----------|---------|-----------------------------------------------------------------------------------------------------------------------------------------------------------------------------------|
| Peter L.  | Elkin    | MD      | Department of Biomedical Informatics, University at Buffalo, Buffalo, NY, USA                                                                                                     |
| Farrukh M | Koraishy | PhD, MD | Stony Brook University                                                                                                                                                            |
| George    | Golovko  | PhD     | The University of Texas Medical Branch                                                                                                                                            |
| Vignesh   | Subbian  | MS, PhD | College of Engineering, The University of Arizona, Tucson, AZ, USA                                                                                                                |
| Daniel    | Weisdorf | PhD, MD | University of Minnesota                                                                                                                                                           |
| Lawrence  | Sinoway  | PhD     | Penn State University, University Park, PA, USA                                                                                                                                   |
| Hiroki    | Morizono | BS, PhD | Children's National Hospital, Washington, DC, USA                                                                                                                                 |
| Keith A.  | Crandall | PhD, MA | Computational Biology Institute and Department of Biostatistics & Bioinformatics, Milken Institute School of Public Health, The George Washington University, Washington, DC, USA |

|                        |              |          |                                                                                                                                                                                                        |
|------------------------|--------------|----------|--------------------------------------------------------------------------------------------------------------------------------------------------------------------------------------------------------|
| Ali                    | Rahnavard    | PhD      | Computational Biology<br>Institute and Department<br>of Biostatistics &<br>Bioinformatics, Milken<br>Institute School of Public<br>Health, The George<br>Washington University,<br>Washington, DC, USA |
| Nawar                  | Shara        | PhD      | Georgetown University,<br>Washington, DC, USA                                                                                                                                                          |
| Alysha                 | Taxter       | MD, MSCE | Wake Forest University<br>Health Sciences                                                                                                                                                              |
| Brian                  | Ostasiewski  | BS       | Wake Forest University<br>Health Sciences, Winston<br>Salem, NC, USA                                                                                                                                   |
| Qianqian               | Song         | PhD      | Department of Cancer<br>Biology, Wake Forest<br>School of Medicine,<br>Winston-Salem, NC, USA                                                                                                          |
| Uma Maheswara<br>Reddy | Vangala      | MS       | University of<br>Massachusetts Medical<br>School                                                                                                                                                       |
| Katherine Ruiz         | De Luzuriaga | MD       | University of<br>Massachusetts Medical<br>School Worcester                                                                                                                                             |
| Rasha                  | Khatib       | MS, PhD  | Advocate Health Care<br>Network                                                                                                                                                                        |

|       |            |         |                                                                                              |
|-------|------------|---------|----------------------------------------------------------------------------------------------|
| John  | Kirwan     | MS, PhD | Pennington Biomedical<br>Research Center                                                     |
| James | von Oehsen | BS, PhD | Rutgers, The State<br>University of New Jersey                                               |
| Jason | Moore      | PhD     | University of Pennsylvania                                                                   |
| Ankit | Sakhuja    | MD      | West Virginia University                                                                     |
| Joni  | Rutter     | PhD     | National Center for<br>Advancing Translational<br>Sciences, National<br>Institutes of Health |

| Location (city, state/province, country) | Role or Contribution, eg, chair, principal investigator                                                                                                                                                                                         | Group (if more than 1 Group listed in the byline) and/or Subgroup (eg, Steering Committee) |
|------------------------------------------|-------------------------------------------------------------------------------------------------------------------------------------------------------------------------------------------------------------------------------------------------|--------------------------------------------------------------------------------------------|
| Ann Arbor, MI, USA                       | clinical subject matter expertise, manuscript drafting                                                                                                                                                                                          |                                                                                            |
| Ann Arbor, MI, USA                       | clinical data model expertise, data analysis, data curation, data integration, data quality assurance, database / information systems admin                                                                                                     |                                                                                            |
| Ann Arbor, MI, USA                       | project management                                                                                                                                                                                                                              |                                                                                            |
| Ann Arbor, MI, USA                       | data analysis, data curation, data integration, data quality assurance, data security, database / information systems admin, project management, regulatory oversight / admin<br>data curation, data integration, manuscript review and editing |                                                                                            |
| Ann Arbor, MI, USA                       |                                                                                                                                                                                                                                                 |                                                                                            |
| Ann Arbor, MI, USA                       | funding acquisition, governance, project evaluation, regulatory oversight / admin                                                                                                                                                               |                                                                                            |
| Atlanta, GA, USA                         | manuscript review and editing                                                                                                                                                                                                                   |                                                                                            |
| Atlanta, GA, USA                         | data analysis, data integration, data quality assurance                                                                                                                                                                                         |                                                                                            |
| Atlanta, GA, USA                         | clinical subject matter expertise, manuscript review and editing                                                                                                                                                                                |                                                                                            |
| Auburn, AL                               | clinical subject matter expertise, clinical data model expertise                                                                                                                                                                                |                                                                                            |
| Baltimore, MD USA                        | clinical subject matter expertise, project management                                                                                                                                                                                           |                                                                                            |
| Baltimore, MD, USA                       | project management                                                                                                                                                                                                                              |                                                                                            |
| Baltimore, MD, USA                       | data curation, data quality assurance                                                                                                                                                                                                           |                                                                                            |

Baltimore, MD, USA clinical subject matter expertise, data analysis, manuscript review and editing, N3C Phenotype definition

Berkeley, CA, USA biological subject matter expertise, data analysis, statistical analysis

Bethesda, MD, USA software engineering (of enclave platform)

Bethesda, MD, USA data analysis, data quality assurance, project management

Birmingham, AL, USA biological subject matter expertise, data analysis, database / information systems admin, statistical analysis

Birmingham, AL, USA biological subject matter expertise, clinical subject matter expertise

Birmingham, AL, USA manuscript drafting, manuscript review and editing, statistical analysis

Birmingham, AL, USA clinical subject matter expertise, manuscript review and editing

Birmingham, AL, USA data curation, manuscript review and editing

Bloomington, IN, USA clinical data model expertise, clinical subject matter expertise, data curation

Boston, MA, USA clinical subject matter expertise, data curation, data integration

Bronx, NY, USA data curation, data quality assurance, database / information systems admin, manuscript review and editing, project management

|                               |                                                                                                                                                           |
|-------------------------------|-----------------------------------------------------------------------------------------------------------------------------------------------------------|
| Chapel Hill, NC, USA          | clinical subject matter expertise, marketing and communications, regulatory oversight / admin                                                             |
| Chapel Hill, NC, USA          | manuscript review and editing, project management                                                                                                         |
| Charleston, SC, USA           | clinical subject matter expertise, data curation, manuscript review and editing, marketing and communications, regulatory oversight / admin               |
| Charleston, SC, USA           | data integration, funding acquisition, marketing and communications, project management, regulatory oversight / admin                                     |
| Charlottesville, VA, USA      | data integration, database / information systems admin                                                                                                    |
| Charlottesville, VA, USA      | data integration, database / information systems admin                                                                                                    |
| Charlottesville, VA, USA      | data integration, database / information systems admin                                                                                                    |
| Chicago, IL, USA              | data curation, database / information systems admin                                                                                                       |
| Chicago, IL, USA              | clinical data model expertise, clinical subject matter expertise, data curation, data quality assurance, database / information systems admin             |
| Chicago, IL, USA              | governance                                                                                                                                                |
| Chicago, IL, USA              | database / information systems admin                                                                                                                      |
| Galveston, Galveston, TX, USA | project management                                                                                                                                        |
| Galveston, Galveston, TX, USA | clinical data model expertise, data integration, data quality assurance, database / information systems admin, software engineering (of enclave platform) |

|                               |                                                                                                                                                                                                                                                                                  |
|-------------------------------|----------------------------------------------------------------------------------------------------------------------------------------------------------------------------------------------------------------------------------------------------------------------------------|
| Galveston, Galveston, TX, USA | biological subject matter expertise, clinical data model expertise, clinical subject matter expertise, data analysis, data curation, data integration, data quality assurance, data security, data visualization, database / information systems admin, N3C Phenotype definition |
| Galveston, TX, USA            | data curation, data integration, data quality assurance, project management, regulatory oversight / admin                                                                                                                                                                        |
| Indianapolis, IN, USA         | clinical data model expertise, data analysis, governance, N3C Phenotype definition                                                                                                                                                                                               |
| Indianapolis, IN, USA         | data curation, data quality assurance, funding acquisition, governance, manuscript review and editing                                                                                                                                                                            |
| Iowa City, IA, USA            | data visualization, database / information systems admin, funding acquisition, project management, software engineering (of enclave platform)                                                                                                                                    |
| Iowa City, IA, USA            | data curation                                                                                                                                                                                                                                                                    |
| Jackson, MS, USA              | clinical data model expertise, clinical subject matter expertise, data curation                                                                                                                                                                                                  |
| La Jolla, CA, USA             | data integration                                                                                                                                                                                                                                                                 |
| Lexington, KY, USA            | governance, project management                                                                                                                                                                                                                                                   |
| Lexington, KY, USA            | data integration, data quality assurance, database / information systems admin, N3C Phenotype definition                                                                                                                                                                         |
| Lexington, KY, USA            | clinical subject matter expertise                                                                                                                                                                                                                                                |

|                                   |                                                                                                                              |
|-----------------------------------|------------------------------------------------------------------------------------------------------------------------------|
| Lexington, KY, USA                | data security, governance, regulatory oversight / admin                                                                      |
| Lexington, KY, USA                | clinical data model expertise, data curation, data integration, data quality assurance, database / information systems admin |
| Lexington, KY, USA                | manuscript review and editing                                                                                                |
| Los Angeles, CA, USA              | clinical data model expertise, data quality assurance, database / information systems admin, N3C Phenotype definition        |
| Los Angeles, Los Angeles, CA, USA | funding acquisition, governance                                                                                              |
| Madison, WI, USA                  | data integration                                                                                                             |
| Madison, WI, USA                  | clinical data model expertise, data curation                                                                                 |
| Mayo Clinic, Rochester, MN, USA   | data integration, N3C Phenotype definition                                                                                   |
| Mayo Clinic, Rochester, MN, USA   | data analysis                                                                                                                |
| Memphis, TN, USA                  | project management                                                                                                           |
| Miami, FL, USA                    | governance                                                                                                                   |
| Miami, FL, USA                    | data analysis, data curation, data quality assurance, data security, database / information systems admin                    |
| Michigan Medicine                 | biological subject matter expertise, clinical subject matter expertise, manuscript review and editing                        |
| Milwaukee, WI, USA                | project management                                                                                                           |
| Milwaukee, WI, USA                | data curation                                                                                                                |



Milwaukee, WI, USA

Minneapolis, MN, USA

funding acquisition

Minneapolis, MN, USA

data quality assurance, N3C Phenotype definition

Nashville, TN, USA

data integration, project management

Nashville, TN, USA

clinical data model expertise, data curation, data quality assurance, project management, regulatory oversight / admin

Nashville, TN, USA

database / information systems admin, funding acquisition, governance, manuscript review and editing

New York, NY, USA

data curation, data integration, funding acquisition, manuscript review and editing

New York, NY, USA

biological subject matter expertise, clinical data model expertise, clinical subject matter expertise, data curation, data integration, data quality assurance, data security, funding acquisition, project management, regulatory oversight / admin

New York, NY, USA

data integration, project management, regulatory oversight / admin

New York, NY, USA

biological subject matter expertise, clinical subject matter expertise

New York, NY, USA

data curation, data integration, data quality assurance, data security, database / information systems admin

Omaha, NE, USA

N3C Phenotype definition, project evaluation

|                     |                                                                                       |
|---------------------|---------------------------------------------------------------------------------------|
| Omaha, NE, USA      | clinical subject matter expertise, funding acquisition, project management            |
| Pittsburgh, PA, USA | clinical data model expertise, N3C Phenotype definition                               |
| Portland, OR, USA   | project management, regulatory oversight / admin                                      |
| Portland, OR, USA   | project evaluation                                                                    |
| Portland, OR, USA   | clinical subject matter expertise, funding acquisition, manuscript review and editing |
| Portland, OR, USA   | manuscript review and editing                                                         |
| Portland, OR, USA   | project management                                                                    |
| Portland, OR, USA   | clinical subject matter expertise                                                     |
| Roanoke, VA, USA    | database / information systems admin                                                  |
| Roanoke, VA, USA    | database / information systems admin                                                  |
| Roanoke, VA, USA    | project management                                                                    |
| Rochester, NY, USA  | data visualization                                                                    |
| Rochester, NY, USA  | funding acquisition, governance, regulatory oversight / admin                         |
| Rochester, NY, USA  | database / information systems admin, project management                              |

|                                      |                                                                                                                                                                           |
|--------------------------------------|---------------------------------------------------------------------------------------------------------------------------------------------------------------------------|
| Salt Lake City, UT, USA              | database / information systems admin,<br>manuscript review and editing                                                                                                    |
| Salt Lake City, Utah, USA            | data integration, funding acquisition, project<br>management                                                                                                              |
| San Antonio, San Antonio,<br>TX, USA |                                                                                                                                                                           |
| San Bernadino, CA, USA               | data curation, data integration, data quality<br>assurance, governance                                                                                                    |
| Seattle, WA, USA                     | clinical data model expertise, manuscript<br>review and editing                                                                                                           |
| Seattle, WA, USA                     | data integration                                                                                                                                                          |
| Seattle, WA, USA                     | project management                                                                                                                                                        |
| Seattle, WA, USA                     | clinical subject matter expertise                                                                                                                                         |
| Seattle, WA, USA                     | governance                                                                                                                                                                |
| Seattle, WA, USA                     | project evaluation, project management,<br>regulatory oversight / admin                                                                                                   |
| St. Louis, MO, USA                   | manuscript review and editing                                                                                                                                             |
| St. Louis, Saint Louis, MO,<br>USA   | clinical data model expertise, data curation,<br>data integration, funding acquisition,<br>manuscript review and editing, N3C Phenotype<br>definition, project management |
| Stony Brook Medicine                 | clinical subject matter expertise, N3C<br>Phenotype definition                                                                                                            |

|                          |                                                                                                                                                                      |
|--------------------------|----------------------------------------------------------------------------------------------------------------------------------------------------------------------|
| Stony Brook, NY, USA     | clinical data model expertise, data curation,<br>data integration, governance, N3C Phenotype<br>definition                                                           |
| Stony Brook, NY, USA     | manuscript review and editing, N3C Phenotype<br>definition                                                                                                           |
| The Galveston, TX, USA   | data curation, data integration, data quality<br>assurance, database / information systems<br>admin, governance, project management,<br>regulatory oversight / admin |
| Tucson, AZ, USA          | clinical data model expertise, data quality<br>assurance, manuscript drafting, project<br>management                                                                 |
| University of Minnesota  | funding acquisition                                                                                                                                                  |
| University Park, PA, USA |                                                                                                                                                                      |
| Washington, DC, USA      | data curation, data integration, database /<br>information systems admin                                                                                             |
| Washington, DC, USA      | biological subject matter expertise, data<br>integration, funding acquisition, manuscript<br>review and editing, regulatory oversight / admin                        |

|                        |                                                                                                                                                                                                                                                                                                                                     |
|------------------------|-------------------------------------------------------------------------------------------------------------------------------------------------------------------------------------------------------------------------------------------------------------------------------------------------------------------------------------|
| Washington, DC, USA    | biological subject matter expertise, clinical data model expertise, clinical subject matter expertise, data analysis, funding acquisition, manuscript review and editing, statistical analysis                                                                                                                                      |
| Washington, DC, USA    | data integration                                                                                                                                                                                                                                                                                                                    |
| Winston Salem, NC, USA | regulatory oversight / admin                                                                                                                                                                                                                                                                                                        |
| Winston Salem, NC, USA | data curation, data integration, data quality assurance                                                                                                                                                                                                                                                                             |
| Winston-Salem, NC, USA | manuscript review and editing                                                                                                                                                                                                                                                                                                       |
| Worcester, MA, USA     | clinical data model expertise, clinical subject matter expertise, data analysis, data curation, data integration, data quality assurance, data security, data visualization, database / information systems admin, marketing and communications, project evaluation, project management, software engineering (of enclave platform) |
| Worcester, MA, USA     | clinical data model expertise, clinical subject matter expertise, governance, marketing and communications, project evaluation, project management, regulatory oversight / admin                                                                                                                                                    |
| Downers Grove, IL, USA | clinical data model expertise, data integration, project management                                                                                                                                                                                                                                                                 |

|                       |                                                                                                                              |
|-----------------------|------------------------------------------------------------------------------------------------------------------------------|
| Baton Rouge, LA, USA  | biological subject matter expertise, clinical subject matter expertise, data quality assurance, regulatory oversight / admin |
| Brunswick, NJ, USA    | data analysis, data integration, data quality assurance, data security, governance                                           |
| Philadelphia, PA, USA | manuscript review and editing, marketing and communications                                                                  |
| Morgantown, WV, USA   | clinical subject matter expertise, manuscript review and editing                                                             |
| Bethesda, MD, USA     | governance                                                                                                                   |
